# Supplementary material
Source: publisher figshare collection journal article supplement (https://tandf.figshare.com/articles/dataset/_/3443402)
Supplement: Supplementary file 1 [file 2]

Journal of Vertebrate Paleontology

SUPPLEMENTARY DATA 3

Comparative anatomy, phylogeny and systematics of the Miocene giraffid *Decennatherium pachecoi* Crusafont, 1952 (Mammalia, Ruminantia, Pecora): state of the art

MARIA RIOS,\* ISRAEL M. SÁNCHEZ, and JORGE MORALES

Departamento de Paleobiología, Museo Nacional de Ciencias Naturales-CSIC, C/ José Gutiérrez Abascal, 2, 28006 Madrid, Spain,

maria.rios.iba@mncn.csic.es; micromeryx@gmail.com; mcnm166@mncn.csic.es

\*Corresponding author.

SUPPLEMENTARY DATA 3. Statistics of the dimensions (in mm) of the dentition and postcranial skeleton of the Giraffidae included in our phylogenetic analysis.

TABLE 1S. Statistics of the dimensions (in mm) of the lower dentition of the Giraffidae included in our phylogenetic analysis. **Abbreviations:** **max**, maximum value; **min**, minimum value; **N**, number of specimens; **SD**, standard deviation.

| Adult mandible                    | Reference (s)                       | p2m3 |       |       |       |       | p2-p4 |       |       |       |       | m1-m3 |       |       |       |      | p2-p4/m1-m3 |       |       |       |       |
|-----------------------------------|-------------------------------------|------|-------|-------|-------|-------|-------|-------|-------|-------|-------|-------|-------|-------|-------|------|-------------|-------|-------|-------|-------|
|                                   |                                     | N    | min   | max   | media | SD    | N     | min   | max   | media | SD    | N     | min   | max   | media | SD   | N           | min   | max   | media | SD    |
| <i>Birgerbohlinia schaubi</i>     | Crusafont, 1952                     | 1    | 116.4 | 116.4 | 116.4 | 0     |       |       |       |       |       | 5     | 128.4 | 137.5 | 132.1 | 4.96 |             |       |       |       |       |
| <i>Bramatherium megacephalum</i>  |                                     | 1    | 210   | 210   | 210   | 0     | 1     | 82.83 | 82.83 | 82.83 | 0     | 1     | 128.7 | 128.7 | 128.7 | 0    | 1           | 0.64  | 0.64  | 0.64  | 0     |
| <i>Canthumeryx sirtensis</i>      | Hamilton, 1978                      | 1    | 121   | 121   | 121   | 0     | 1     | 53    | 53    | 53    | 0     | 1     | 68    | 68    | 68    | 0    | 1           | 0.78  | 0.78  | 0.78  | 0     |
| <i>Decennatherium? macedoniae</i> | Geraads, 1989                       | 2    | 170   | 187   | 178.5 | 12.02 | 1     | 73    | 73    | 73    | 0     | 2     | 101   | 113   | 107   | 8.48 | 1           | 0.65  | 0.65  | 0.65  | 0     |
| <i>Giraffa jumae</i>              | Geraads et al., 2013                |      |       |       |       |       | 2     | 62    | 72.5  | 67.25 | 7.42  | 6     | 94    | 106.3 | 97.96 | 4.43 | 2           | 0.66  | 0.74  | 0.69  | 0.056 |
| <i>Giraffa stillei</i>            | Harris, 1976a; Geraads et al., 2013 |      |       |       |       |       | 2     | 54    | 57.2  | 55.62 | 2.62  | 4     | 74    | 82.2  | 77.25 | 3.56 | 2           | 0.73  | 0.74  | 0.73  | 0.007 |
| <i>Giraffokeryx primaevus</i>     | Churcher, 1970; Hamilton, 1978      | 4    | 112   | 133   | 127.5 | 10.34 | 5     | 49    | 54    | 51.6  | 2.43  | 6     | 64    | 80    | 74.5  | 7.79 | 4           | 0.61  | 0.75  | 0.68  | 0.05  |
| <i>Giraffokeryx punjabiensis</i>  | Churcher, 1970; Hamilton, 1978      | 5    | 128.4 | 151   | 142   | 11.27 | 5     | 54.98 | 62.5  | 59.76 | 3.314 | 6     | 76.04 | 90.76 | 85.35 | 5.77 | 5           | 0.684 | 0.727 | 0.71  | 0.017 |

|                                 |                                  |   |     |     |       |     |   |       |       |      |     |   |       |       |       |     |   |     |     |      |     |
|---------------------------------|----------------------------------|---|-----|-----|-------|-----|---|-------|-------|------|-----|---|-------|-------|-------|-----|---|-----|-----|------|-----|
| <i>Helladotherium duvernoyi</i> | Geraads et al., 2005             |   |     |     |       |     | 1 | 93.5  | 93.5  | 93.5 | 0   | 2 | 138   | 148   | 143.5 | 6.3 | 1 | 0.6 | 0.6 | 0.67 | 0   |
|                                 |                                  |   |     |     |       |     |   |       |       |      |     |   |       |       |       |     |   | 72  | 72  | 2    |     |
| <i>Honanotherium schlosseri</i> | Bohlin, 1926                     | 1 | 173 | 173 | 173   | 0   | 2 | 62    | 75    | 68.5 | 9.1 | 2 | 106   | 115   | 110.5 | 6.3 | 1 | 0.5 | 0.5 | 0.58 | 0   |
|                                 |                                  |   |     |     |       |     |   |       |       |      | 92  |   |       |       |       |     |   | 85  | 85  | 5    |     |
| <i>Okapia johnstoni</i>         |                                  | 2 | 126 | 130 | 128.3 | 2.4 | 2 | 51.38 | 52.04 | 51.7 | 0.4 | 2 | 75.74 | 80.71 | 78.2  | 3.5 | 2 | 0.6 | 0.6 | 0.66 | 0.0 |
|                                 |                                  |   | .6  |     |       | 2   |   |       |       | 1    | 6   |   |       |       | 2     | 1   |   | 4   | 8   |      | 2   |
| <i>Palaeotragus coelophrys</i>  | Mecquenem, 1924                  | 1 | 170 | 170 | 170   | 0   | 1 | 65    | 65    | 65   | 0   | 1 | 100   | 100   | 100   | 0   | 1 | 0.6 | 0.6 | 0.65 | 0   |
|                                 |                                  |   |     |     |       |     |   |       |       |      |     |   |       |       |       |     |   | 5   | 5   |      |     |
| <i>Palaeotragus microdon</i>    | Bohlin, 1926                     | 8 | 130 | 136 | 132   | 2.0 | 9 | 47    | 55    | 49.3 | 2.3 | 1 | 80    | 93    | 83.5  | 3.6 | 7 | 0.5 | 0.6 | 0.59 | 0.0 |
|                                 |                                  |   |     |     |       | 7   |   |       |       | 3    | 4   | 0 |       |       |       | 5   | 7 | 2   |     | 1    |     |
| <i>Palaeotragus rouenii</i>     | Kostopoulos, 2009                | 3 | 124 | 133 | 127.4 | 4.8 | 3 | 47.86 | 51.7  | 49.6 | 1.9 | 7 | 71.7  | 82.7  | 76.4  | 3.8 | 3 | 0.6 | 0.6 | 0.65 | 0.0 |
|                                 |                                  |   | .5  |     |       | 8   |   |       |       | 8    | 2   |   |       |       |       | 5   | 4 | 7   |     | 17   |     |
| <i>Samotherium sinense</i>      | Bohlin, 1926                     | 1 | 198 | 198 | 198   | 0   | 1 | 76    | 76    | 76   | 0   | 1 | 122   | 122   | 122   | 0   | 1 | 0.6 | 0.6 | 0.62 | 0   |
|                                 |                                  |   |     |     |       |     |   |       |       |      |     |   |       |       |       |     |   | 2   | 2   |      |     |
| <i>Samotherium boissieri</i>    | Kostopoulos, 2009                | 5 | 177 | 189 | 182.9 | 4.2 | 6 | 67.6  | 72.4  | 70.5 | 1.7 | 5 | 109.7 | 119   | 113   | 3.7 | 5 | 0.6 | 0.6 | 0.63 | 0.0 |
|                                 |                                  |   | .5  | .2  |       | 07  |   |       |       | 7    | 59  |   |       |       |       | 3   |   | 07  | 56  |      | 2   |
| <i>Samotherium major</i>        | Kostopoulos, 2009                | 6 | 198 | 217 | 206.2 | 7.3 | 5 | 71    | 84    | 75.8 | 5.1 | 5 | 128   | 133   | 131   | 2.0 | 5 | 0.5 | 0.6 | 0.57 | 0.0 |
|                                 |                                  |   |     |     |       | 6   |   |       |       | 2    | 6   |   |       |       |       | 1   |   | 4   | 3   |      | 34  |
| <i>Samotherium neumayri</i>     | Mecquenem, 1924;<br>Bohlin, 1926 | 2 | 195 | 209 | 202   | 9.8 | 2 | 74    | 77    | 75.5 | 2.1 | 2 | 125   | 131   | 128   | 4.2 | 2 | 0.5 | 0.5 | 0.58 | 0.0 |
|                                 |                                  |   |     |     |       | 9   |   |       |       |      | 2   |   |       |       |       | 4   |   | 9   | 9   |      | 02  |
| <i>Schansitherium tafeli</i>    | Bohlin, 1926; Hamilton,<br>1978  | 2 | 187 | 198 | 192.5 | 7.7 | 2 | 69    | 74    | 71.5 | 3.5 | 2 | 118   | 124   | 121   | 4.2 | 2 | 0.5 | 0.6 | 0.59 | 0.0 |
|                                 |                                  |   |     |     |       | 7   |   |       |       |      | 3   |   |       |       |       | 4   |   | 8   |     |      | 08  |

|                    |    |     |     |      |     |    |     |     |      |   |   |     |     |     |   |
|--------------------|----|-----|-----|------|-----|----|-----|-----|------|---|---|-----|-----|-----|---|
| <i>Sivatherium</i> | 2  | 87. | 133 | 110. | 32. | 1  | 40. | 40. | 40.6 | 0 | 1 | 190 | 190 | 190 | 0 |
| <i>giganteum</i>   | 27 | .7  | 5   | 81   |     | 61 | 61  | 1   |      |   |   |     |     |     |   |

TABLE 2S. Statistics of the dimensions (in mm) of the m3 of the Giraffidae included in our phylogenetic analysis. **Abbreviations:** **max**, maximum value; **min**, minimum value; **N**, number of specimens; **SD**, standard deviation.

| m3                     |                                                          | Reference (s) |  | Length |          |          |           |     | Width |      |          |           |     | L/W |          |          |           |     |
|------------------------|----------------------------------------------------------|---------------|--|--------|----------|----------|-----------|-----|-------|------|----------|-----------|-----|-----|----------|----------|-----------|-----|
|                        |                                                          |               |  | N      | mi<br>n. | ma<br>x. | me<br>dia | SD  | N     | min. | ma<br>x. | me<br>dia | SD  | N   | mi<br>n. | ma<br>x. | me<br>dia | SD  |
| <i>Birgerbohlinia</i>  | Alcalá, 1994                                             |               |  | 4      | 47.      | 55.      | 51.       | 3.3 | 4     | 26.3 | 30       | 28.       | 1.8 | 4   | 1.7      | 2.0      | 1.8       | 0.1 |
| <i>schaubi</i>         |                                                          |               |  |        | 34       | 39       | 63        | 8   |       | 9    |          | 03        | 2   |     |          | 8        | 4         | 6   |
| <i>Bohlinia attica</i> | Harris, 1976a                                            |               |  | 2      | 36       | 41.      | 38.       | 4.1 | 2     | 19   | 19.      | 19.       | 0.2 | 1   | 2.1      | 2.1      | 2.1       | 0   |
|                        |                                                          |               |  |        |          | 84       | 92        | 2   |       |      | 32       | 16        | 2   |     | 7        | 7        | 7         |     |
| <i>Bramatherium</i>    | Pilgrim, 1911; Colbert, 1935; Bhatti, 2004; Khan et al., |               |  | 9      | 44       | 67.      | 49.       | 7.4 | 9     | 19   | 32       | 24.       | 5.1 | 9   | 1.7      | 2.3      | 2.0       | 0.2 |
| <i>megacephalum</i>    | 2011a; Bhatti et al., 2012a                              |               |  |        |          | 4        | 26        | 3   |       |      |          | 82        | 9   |     | 5        | 2        | 2         | 5   |
| <i>Canthumeryx</i>     | Hamilton, 1973, 1978                                     |               |  | 9      | 26.      | 33       | 30.       | 2.1 | 1     | 12   | 17       | 14.       | 1.6 | 9   | 1.9      | 2.2      | 2.1       | 0.1 |
| <i>sirtensis</i>       |                                                          |               |  |        | 5        |          | 78        | 3   | 0     |      |          | 36        | 3   |     | 4        | 8        | 4         | 2   |
| <i>Decennatherium</i>  | Geraads, 1979                                            |               |  | 1      | 56       | 56       | 56        | 0   | 1     | 29   | 29       | 29        | 0   | 1   | 1.9      | 1.9      | 1.9       | 0   |
| cf. <i>pachecoi</i>    |                                                          |               |  |        |          |          |           |     |       |      |          |           |     |     | 3        | 3        | 3         |     |
| <i>Decennatherium</i>  | Crusafont, 1952                                          |               |  | 1      | 47.      | 56.      | 53.       | 3.0 | 8     | 24   | 28.      | 25.       | 1.5 | 8   | 1.9      | 2.2      | 2.0       | 0.0 |
| <i>pachecoi</i>        |                                                          |               |  | 0      | 5        | 6        | 81        | 2   |       |      | 7        | 92        | 5   |     | 7        | 4        | 6         | 8   |
| <i>Georgiomeryx</i>    | de Bonis et al., 1997                                    |               |  | 1      | 31       | 31       | 31        | 0   | 1     | 14.8 | 14.      | 14.       | 0   | 1   | 2.0      | 2.0      | 2.0       | 0   |
| <i>georgalasi</i>      |                                                          |               |  |        |          |          |           |     |       |      | 8        | 8         |     |     | 9        | 9        | 9         |     |

|                                  |                                                                                                   |        |          |           |           |           |        |           |           |           |           |        |           |           |           |           |
|----------------------------------|---------------------------------------------------------------------------------------------------|--------|----------|-----------|-----------|-----------|--------|-----------|-----------|-----------|-----------|--------|-----------|-----------|-----------|-----------|
| <i>Giraffa camelopardalis</i>    | Pilgrim, 1911; Harris, 1976a                                                                      | 2<br>9 | 41.<br>5 | 44.<br>5  | 43.<br>2  | 1.8<br>3  | 2      | 23.2      | 23.<br>7  | 23.<br>45 | 0.3<br>5  | 2<br>7 | 1.7<br>7  | 1.9<br>2  | 1.8<br>4  | 0.1       |
| <i>Giraffa jumae</i>             | Harris, 1976a                                                                                     | 8<br>6 | 36.<br>7 | 50.<br>7  | 42.<br>92 | 4.1<br>8  | 9      | 20.2      | 23.<br>6  | 22.<br>34 | 1.3<br>3  | 8<br>7 | 1.5<br>7  | 2.1<br>6  | 1.9<br>2  | 0.1<br>8  |
| <i>Giraffa stillei</i>           | Harris, 1991                                                                                      | 1<br>0 | 34.<br>6 | 44.<br>5  | 41.<br>57 | 3.5<br>1  | 1      | 21.9      | 21.<br>9  | 21.<br>9  | 0         | 1<br>3 | 2.0<br>3  | 2.0<br>3  | 2.0<br>3  | 0         |
| <i>Giraffokeryx primaevus</i>    | Churchar, 1970; Hamilton, 1978                                                                    | 1<br>2 | 24.<br>5 | 33.<br>7  | 21.<br>01 | 3.0<br>1  | 1<br>2 | 13        | 16.<br>2  | 15        | 0.9<br>6  | 1<br>1 | 1.9<br>5  | 2.2<br>9  | 2.0<br>9  | 0.1       |
| <i>Giraffokeryx punjabiensis</i> | Pilgrim, 1911; Matthew, 1929; Churchar, 1970; Bhatti, 2004; Khan et al., 2010; Khan et al., 2011b | 3<br>6 | 23.<br>5 | 41.<br>12 | 34.<br>63 | 3.7<br>16 | 3<br>6 | 13        | 19.<br>52 | 17.<br>27 | 1.5<br>28 | 3<br>6 | 1.3<br>43 | 2.3<br>67 | 2.0<br>14 | 0.2<br>18 |
| <i>Helladotherium duvernoyi</i>  | Geraads et al., 2005                                                                              | 2      | 59       | 61        | 60        | 1.4<br>1  |        |           |           |           |           |        |           |           |           |           |
| <i>Honanotherium schlosseri</i>  | Bohlin, 1926                                                                                      | 3      | 47       | 48        | 47.<br>66 | 0.5<br>7  | 3      | 25        | 28        | 26.<br>33 | 1.5<br>2  | 3      | 1.7<br>1  | 1.8<br>8  | 1.8<br>1  | 0.0<br>8  |
| <i>Injanatherium arabicum</i>    | Morales et al., 1987                                                                              | 2      | 34       | 34.<br>9  | 34.<br>45 | 0.6<br>3  | 2      | 16.5      | 16.<br>67 | 16.<br>58 | 0.1<br>2  | 2      | 2.0<br>6  | 2.0<br>9  | 2.0<br>7  | 0.0<br>2  |
| <i>Palaeotragus microdon</i>     | Bohlin, 1926                                                                                      | 7      | 34       | 38        | 36        | 1.4<br>1  | 8      | 15        | 19        | 17.<br>87 | 1.2<br>4  | 7      | 1.7<br>9  | 2.3<br>3  | 2.0<br>2  | 0.1<br>6  |
| <i>Palaeotragus rouenii</i>      | Gaudry, 1861                                                                                      | 3<br>4 | 31.<br>4 | 33.<br>79 | 32.<br>39 | 1.2<br>4  | 2      | 14.6<br>5 | 15.<br>09 | 14.<br>87 | 0.3<br>1  | 2      | 2.1<br>4  | 2.2<br>4  | 2.1<br>9  | 0.0<br>6  |
| <i>Samotherium sinense</i>       | Schlosser, 1903; Pilgrim, 1911; Bohlin, 1926                                                      | 2      | 51       | 51        | 51        | 0         | 3      | 18        | 27        | 23.<br>67 | 4.9<br>33 | 2      | 1.8<br>11 | 1.8<br>89 | 1.8<br>5  | 0.0<br>55 |

|                                |                                             |        |           |           |           |          |        |             |           |           |          |        |          |          |          |          |
|--------------------------------|---------------------------------------------|--------|-----------|-----------|-----------|----------|--------|-------------|-----------|-----------|----------|--------|----------|----------|----------|----------|
| <i>Samotherium boissieri</i>   | Bohlin, 1926                                | 6      | 45.<br>56 | 60.<br>89 | 52.<br>8  | 5.1<br>9 | 6      | 22.3<br>1   | 27.<br>94 | 24.<br>64 | 1.9<br>9 | 6      | 1.9<br>6 | 2.4<br>3 | 2.1<br>4 | 0.2      |
| <i>Schansitherium tafeli</i>   | Pilgrim, 1911; Bohlin, 1926                 | 2      | 48        | 52        | 50        | 2.8<br>2 | 2      | 24          | 26        | 25        | 1.4<br>1 | 2      | 2        | 2        | 2        | 0        |
| <i>Sivatherium giganteum</i>   | Colbert, 1935; Khan et al., 2011a           | 1<br>1 | 57        | 75        | 65.<br>86 | 5.5      | 1<br>1 | 29          | 40        | 32.<br>9  | 3.1      | 1<br>1 | 1.8<br>8 | 2.0<br>7 | 2        | 0.0<br>7 |
| <i>Sivatherium hendeyi</i>     | Harris, 1976a                               | 3      | 64.<br>2  | 74.<br>5  | 70.<br>06 | 5.2<br>9 | 3      | 33.1        | 38.<br>1  | 35.<br>3  | 2.5<br>5 | 3      | 1.9<br>4 | 2.0<br>3 | 1.9<br>8 | 0.0<br>6 |
| <i>Sivatherium maurusium</i>   | Pilgrim, 1911; Harris, 1991; Robinson, 2011 | 1<br>3 | 60        | 68.<br>2  | 63.<br>3  | 2.7<br>2 | 1<br>4 | 27.3<br>7.8 | 30.<br>38 | 2.6<br>5  |          | 1<br>1 | 1.6      | 2.2<br>7 | 2.0<br>4 | 0.1<br>8 |
| <i>Sivatherium olduvaiense</i> | Singer & Boné, 1960                         | 9      | 59        | 77        | 68.<br>63 | 5.5<br>1 | 1<br>0 | 31          | 39.<br>7  | 33.<br>62 | 2.6<br>1 | 9      | 1.6<br>6 | 2.3<br>9 | 2.0<br>3 | 0.2<br>3 |

TABLE 3S. Statistics of the dimensions (in mm) of the metacarpal of the Giraffidae included in our phylogenetic analysis. **Abbreviations:** **DT**, transversal diameter; **max**, maximum value; **min**, minimum value; **N**, number of specimens; **SD**, standard deviation.

| Metacarpal                    | Reference (s) | Total Length |          |          |           |           | Proximal TD |           |           |           |          | Prox TD/Total length *<br>100 |           |           |           |          |
|-------------------------------|---------------|--------------|----------|----------|-----------|-----------|-------------|-----------|-----------|-----------|----------|-------------------------------|-----------|-----------|-----------|----------|
|                               |               | N            | mi<br>n. | ma<br>x. | me<br>dia | SD        | N           | mi<br>n.  | ma<br>x.  | me<br>dia | SD       | N                             | mi<br>n.  | ma<br>x.  | me<br>dia | SD       |
| <i>Birgerbohlinia schaubi</i> | Montoya, 1994 | 7            | 37<br>3  | 40<br>4  | 386       | 12.<br>82 | 1<br>1      | 79.<br>18 | 99.<br>49 | 89.<br>68 | 7.4<br>8 | 7                             | 21.<br>23 | 24.<br>75 | 23.<br>59 | 1.2<br>4 |

|                                   |                                                                                               |        |           |         |           |           |        |           |           |           |           |        |           |           |           |           |
|-----------------------------------|-----------------------------------------------------------------------------------------------|--------|-----------|---------|-----------|-----------|--------|-----------|-----------|-----------|-----------|--------|-----------|-----------|-----------|-----------|
| <i>Bohlinia attica</i>            | Geraads, 1979; Geraads, 1998; Geraads et al., 2005                                            | 9<br>1 | 66<br>0   | 73<br>0 | 699<br>.9 | 19.<br>02 | 1<br>0 | 82        | 98        | 88.<br>79 | 4.8<br>2  | 8      | 11.<br>69 | 14.<br>1  | 12.<br>76 | 0.6<br>6  |
| <i>Bramatherium megacephalum</i>  | Singer & Boné, 1960                                                                           | 3<br>9 | 38<br>2   | 43<br>2 | 416<br>.5 | 23.<br>51 | 3      | 95        | 10<br>3   | 98        | 4.3<br>5  | 3      | 21.<br>99 | 26.<br>48 | 23.<br>65 | 2.4<br>6  |
| <i>Canthumeryx sirtensis</i>      | Hamilton, 1973, 1978                                                                          | 2<br>0 | 29<br>0   | 31<br>4 | 303<br>.5 | 19.<br>09 | 1      | 46        | 46        | 46        | 0         | 1      | 14.<br>51 | 14.<br>51 | 14.<br>51 | 0         |
| <i>Decennatherium pachecoi</i>    | Crusafont, 1952                                                                               | 1<br>1 | 39<br>1   | 39<br>1 | 391       | 0         | 2      | 73.<br>32 | 90        | 81.<br>66 | 11.<br>97 | 1      | 18.<br>75 | 18.<br>75 | 18.<br>75 | 0         |
| <i>Decennatherium? macedoniae</i> | Geraads, 1989                                                                                 | 1<br>5 | 46<br>5   | 46<br>5 | 465       | 0         | 2      | 82        | 89        | 85.<br>5  | 4.9<br>4  | 1      | 17.<br>63 | 17.<br>63 | 17.<br>63 | 0         |
| <i>Giraffa camelopardalis</i>     | Bohlin, 1926; Harris, 1976a; Geraads, 1979                                                    | 1<br>4 | 60<br>5   | 74<br>6 | 680<br>.4 | 53.<br>69 | 1<br>4 | 83.<br>37 | 10<br>7   | 94.<br>48 | 8.8<br>1  | 1<br>4 | 13.<br>21 | 14.<br>5  | 13.<br>8  | 0.4       |
| <i>Giraffa stillei</i>            | Harris, 1991                                                                                  | 2<br>4 | 74<br>4   | 74<br>8 | 746       | 2.8<br>2  | 7      | 79.<br>7  | 11<br>2   | 93.<br>95 | 9.6<br>9  | 2      | 12.<br>5  | 12.<br>7  | 12.<br>6  | 0.1<br>4  |
| <i>Giraffokeryx primaevus</i>     | Churcher, 1970                                                                                |        |           |         |           |           | 1      | 54.<br>7  | 54.<br>7  | 54.<br>7  | 0         |        |           |           |           |           |
| <i>Helladotherium duvernoyi</i>   | Gaudry, 1873; Pilgrim, 1911; Dietrich, 1937; Melentis, 1974; Kostopoulos, 2009; Geraads, 2009 | 2<br>2 | 40<br>0   | 47<br>0 | 426<br>.3 | 17.<br>73 | 2<br>3 | 87        | 12<br>5   | 106<br>.8 | 10.<br>05 | 1<br>3 | 11.<br>69 | 24.<br>75 | 18.<br>49 | 5.8<br>19 |
| <i>Injanatherium arabicum</i>     | Morales et al., 1987                                                                          |        |           |         |           |           | 2      | 49        | 56.<br>6  | 52.<br>8  | 5.3<br>7  |        |           |           |           |           |
| <i>Okapia johnstoni</i>           | Churcher, 1970                                                                                | 1<br>4 | 29<br>5.3 | 33<br>2 | 316<br>.2 | 9.1<br>5  | 1<br>4 | 52.<br>73 | 59.<br>35 | 56.<br>19 | 2.0<br>7  | 1<br>4 | 16.<br>9  | 19.<br>01 | 17.<br>78 | 0.7<br>4  |

|                                |                                                                |        |         |         |           |           |        |           |           |           |           |        |           |           |           |          |  |
|--------------------------------|----------------------------------------------------------------|--------|---------|---------|-----------|-----------|--------|-----------|-----------|-----------|-----------|--------|-----------|-----------|-----------|----------|--|
| <i>Palaeotragus coelophrys</i> | Mecquenem, 1924                                                | 2      | 33<br>4 | 37<br>0 | 352       | 25.<br>45 |        |           |           |           |           |        |           |           |           |          |  |
| <i>Palaeotragus microdon</i>   | Bohlin, 1926                                                   | 1      | 36<br>8 | 36<br>8 | 368       | 0         | 2      | 48        | 51        | 49.<br>5  | 2.1<br>2  | 1      | 13.<br>04 | 13.<br>04 | 13.<br>04 | 0        |  |
| <i>Palaeotragus rouenii</i>    | Bohlin, 1926; Churcher, 1970; Geraads, 1994; Kostopoulos, 2009 | 5      | 39<br>8 | 43<br>4 | 410       | 14.<br>08 | 1<br>0 | 52        | 63.<br>2  | 58.<br>52 | 3.6<br>2  | 5      | 13.<br>82 | 15.<br>41 | 14.<br>65 | 0.7<br>1 |  |
| <i>Samotherium boissieri</i>   | Bohlin, 1926; Kostopoulos, 2009                                | 1<br>9 | 33<br>0 | 41<br>0 | 357<br>.7 | 20.<br>22 | 1<br>7 | 66.<br>4  | 85.<br>1  | 75.<br>74 | 5.0<br>8  | 1<br>7 | 18.<br>93 | 23.<br>67 | 21.<br>36 | 1.3<br>6 |  |
| <i>Samotherium major</i>       | Geraads, 1994; Kostopoulos, 2009                               | 2<br>9 | 39<br>5 | 44<br>5 | 419<br>.3 | 12.<br>73 | 3<br>3 | 50.<br>3  | 10<br>0.8 | 89.<br>93 | 10.<br>44 | 2<br>9 | 12.<br>73 | 23.<br>58 | 21.<br>35 | 2.3<br>7 |  |
| <i>Samotherium neumayri</i>    | Rodler and Weithofer, 1890; Mecquenem, 1924; Bohlin, 1926      | 3      | 34<br>0 | 47<br>0 | 400       | 65.<br>57 | 6      | 76        | 97        | 84.<br>16 | 8.4       | 1      | 22.<br>35 | 22.<br>35 | 22.<br>35 | 0        |  |
| <i>Samotherium sinense</i>     | Bohlin, 1926                                                   | 6      | 42<br>5 | 46<br>6 | 449<br>.5 | 13.<br>45 | 6      | 89        | 10<br>0   | 92.<br>83 | 4.1<br>6  | 6      | 19.<br>65 | 22.<br>08 | 20.<br>66 | 0.9<br>6 |  |
| <i>Sivatherium giganteum</i>   | Dietrich, 1942; Singer & Boné, 1960                            | 3      | 34<br>8 | 35<br>5 | 350<br>.3 | 4.0<br>4  | 3      | 11<br>9   | 12<br>0   | 119<br>.3 | 0.5<br>7  | 3      | 33.<br>8  | 34.<br>2  | 34.<br>06 | 0.2<br>2 |  |
| <i>Sivatherium hendeyi</i>     | Harris, 1976b                                                  | 4      | 35<br>0 | 41<br>5 | 388<br>.8 | 27.<br>8  | 1<br>1 | 74        | 12<br>1   | 106<br>.8 | 27.<br>8  | 3      | 27        | 31.<br>03 | 28.<br>86 | 2.0<br>2 |  |
| <i>Sivatherium maurusium</i>   | Robinson, 2011                                                 |        |         |         |           |           | 1      | 11<br>4.8 | 11<br>4.8 | 114<br>.8 | 0         |        |           |           |           |          |  |
| <i>Sivatherium olduvaiense</i> | Dietrich, 1942; Singer & Boné, 1960                            | 1      | 29<br>0 | 29<br>0 | 290       | 0         | 1      | 11<br>4   | 11<br>4   | 114       | 0         | 1      | 39.<br>31 | 39.<br>31 | 39.<br>31 | 0        |  |



TABLE 4S. Statistics of the dimensions (in mm) of astragalus of the Giraffidae included in our phylogenetic analysis. **Abbreviations:** **max**, maximum value; **min**, minimum value; **N**, number of specimens; **SD**, standard deviation.

| Astragalus                       | Reference (s)                              | Medial Length |       |       |       |      |
|----------------------------------|--------------------------------------------|---------------|-------|-------|-------|------|
|                                  |                                            | N             | min.  | max.  | media | SD   |
| <i>Birgerbohlinia schaubi</i>    |                                            | 9             | 81,21 | 99,39 | 97,89 | 7,04 |
| <i>Bohlinia attica</i>           | Geraads, 1979                              | 1             | 85,39 | 85,39 | 85,39 | 0    |
| <i>Decennatherium crusafonti</i> | Bosscha-Erbrink, 1976                      | 1             | 80    | 80    | 80    | 0    |
| <i>Decennatherium pachecoi</i>   | Crusafont, 1952; Crusafont, 1966           | 20            | 71,95 | 83,37 | 76,94 | 2,95 |
| <i>Giraffa camelopardalis</i>    | Bohlin, 1926; Harris, 1976a; Geraads, 1979 | 4             | 82    | 91,9  | 86,73 | 4,53 |
| <i>Giraffa jumae</i>             | Harris, 1976a                              | 1             | 89,2  | 89,2  | 89,2  | 0    |
| <i>Giraffa stillei</i>           | Harris, 1991                               | 5             | 78    | 96    | 88,4  | 8,01 |
| <i>Giraffokeryx primaevus</i>    | Churcher, 1970; Hamilton, 1978             | 5             | 51    | 57    | 53,58 | 3,12 |
| <i>Giraffokeryx punjabiensis</i> |                                            | 8             | 51,08 | 58,73 | 54,77 | 2,82 |
| <i>Helladotherium duvernoyi</i>  | Melentis, 1974;                            | 1             | 93    | 93    | 93    | 0    |

| Kostopoulos, 2009               |                                          |    |       |       |        |      |
|---------------------------------|------------------------------------------|----|-------|-------|--------|------|
| <i>Honanotherium schlosseri</i> | Bohlin, 1926                             | 5  | 84    | 97    | 89,8   | 5,11 |
| <i>Injanatherium arabicum</i>   | Morales et al., 1987                     | 3  | 53,8  | 53,3  | 53,03  | 6,07 |
| <i>Okapia johnstoni</i>         | Churcher, 1970                           | 2  | 58,8  | 59,81 | 59,3   | 0,71 |
| <i>Palaeotragus microdon</i>    | Bohlin, 1926                             | 1  | 56    | 56    | 56     | 0    |
| <i>Palaeotragus rouenii</i>     | Kostopoulos, 2009                        | 1  | 65    | 65    | 65     | 0    |
| <i>Samotherium sinense</i>      | Bohlin, 1926                             | 7  | 93    | 105   | 100,57 | 4,92 |
| <i>Samotherium boissieri</i>    | Kostopoulos, 2009                        | 15 | 73,7  | 85,1  | 78,08  | 2,92 |
| <i>Samotherium major</i>        | Kostopoulos, 2009                        | 40 | 83,9  | 107   | 93,7   | 4,3  |
| <i>Samotherium neumayri</i>     | Rodler and Weithofer, 1890; Bohlin, 1926 | 1  | 90    | 90    | 90     | 0    |
| <i>Sivatherium giganteum</i>    | Singer & Boné, 1960                      | 1  | 98,03 | 98,03 | 98,03  | 0    |
| <i>Sivatherium hendeyi</i>      | Harris, 1976b                            | 35 | 84    | 117   | 106,54 | 5,73 |
| <i>Sivatherium maurusium</i>    | Harris, 1991                             | 4  | 80    | 88    | 82     | 4    |

TABLE 5S. Statistics of the dimensions (in mm) of the metatarsal of the Giraffidae included in our phylogenetic analysis. **Abbreviations:** **DT**, transversal diameter; **max**, maximum value; **min**, minimum value; **N**, number of specimens; **SD**, standard deviation.

| Metatarsal                        | Reference (s)                                  | Total Length |       |       |       |       | Proximal TD |       |       |       |      | Prox TD/Total length * 100 |       |       |       |      |
|-----------------------------------|------------------------------------------------|--------------|-------|-------|-------|-------|-------------|-------|-------|-------|------|----------------------------|-------|-------|-------|------|
|                                   |                                                | N            | min   | max   | media | SD    | N           | min   | max   | media | SD   | N                          | min   | max   | media | SD   |
| <i>Birgerbohlinia schaubi</i>     | Crusafont, 1952; Montoya & Morales, 1991       | 2            | 384   | 410   | 397   | 18.34 | 5           | 68    | 80.34 | 76.52 | 5.19 | 2                          | 16.59 | 20.57 | 18.57 | 2.81 |
| <i>Bohlinia attica</i>            | Kostopoulos et al., 1996; Geraads et al., 2005 | 8            | 658   | 702   | 681.3 | 14.16 | 3           | 75    | 85    | 80.5  | 5.07 | 3                          | 11.19 | 12.5  | 11.76 | 0.66 |
| <i>Bramatherium megacephalum</i>  | Pilgrim, 1911; Colbert, 1935                   | 4            | 369   | 450   | 421   | 35.65 | 4           | 68    | 82    | 77.25 | 6.39 | 4                          | 17.97 | 19.03 | 18.35 | 0.49 |
| <i>Canthumeryx sirtensis</i>      | Hamilton, 1978                                 | 4            | 260   | 349   | 287.3 | 42.23 | 5           | 28    | 39    | 32.4  | 4.5  | 4                          | 10.71 | 11.54 | 11.04 | 0.38 |
| <i>Decennatherium crusafonti</i>  | Bosscha-Erbrink, 1976                          |              |       |       |       |       | 1           | 71    | 71    | 71    | 0    |                            |       |       |       |      |
| <i>Decennatherium pachecoi</i>    | Crusafont, 1952                                | 2            | 406.1 | 427.5 | 416.8 | 15.1  | 7           | 57.42 | 74.12 | 62.34 | 5.85 | 2                          | 14.23 | 18.25 | 16.24 | 2.84 |
| <i>Decennatherium? macedoniae</i> | Geraads, 1989                                  | 1            | 480   | 480   | 480   | 0     |             |       |       |       |      |                            |       |       |       |      |
| <i>Giraffa camelopardalis</i>     | Bohlin, 1926; Harris, 1976a                    | 14           | 625   | 765   | 696   | 55.32 | 15          | 68.01 | 91    | 79.02 | 7.76 | 14                         | 10.66 | 12.17 | 11.41 | 0.41 |
| <i>Giraffa jumae</i>              | Harris, 1976a                                  | 1            | 768   | 768   | 768   | 0     | 5           | 83    | 89    | 86.6  | 2.3  | 1                          | 10.   | 10.   | 10.8  | 0    |

|                                 |                                                                                                                                         |   |     |     |      |     |   |     |     |      |     |   |     |     |      |     |
|---------------------------------|-----------------------------------------------------------------------------------------------------------------------------------------|---|-----|-----|------|-----|---|-----|-----|------|-----|---|-----|-----|------|-----|
|                                 |                                                                                                                                         |   |     |     |      |     |   |     |     |      | 2   |   | 81  | 81  | 1    |     |
| <i>Giraffa stillei</i>          | Harris, 1991                                                                                                                            | 4 | 637 | 860 | 726. | 101 | 7 | 72  | 86  | 81.7 | 4.7 | 3 | 9.5 | 12. | 11   | 1.3 |
|                                 |                                                                                                                                         |   |     |     | 5    |     |   |     |     | 1    | 1   |   | 3   | 1   |      | 2   |
| <i>Giraffokeryx primaevus</i>   | Churcher, 1970; Hamilton, 1978                                                                                                          | 2 | 404 | 460 | 432. | 40. | 3 | 40. | 45. | 42.8 | 2.8 | 2 | 9.9 | 9.9 | 9.93 | 0.0 |
|                                 |                                                                                                                                         |   | .2  | .8  | 5    | 02  |   | 1   | 8   |      | 6   |   | 2   | 4   |      | 1   |
| <i>Helladotherium duvernoyi</i> | Gaudry, 1873; Pilgrim, 1911; Bohlin, 1926; Melentis, 1974; Kostopoulos et al., 1996; Roussiakis and Iliopoulos, 2004; Kostopoulos, 2009 | 7 | 440 | 480 | 451. | 16. | 1 | 74  | 93  | 85.6 | 7.0 | 7 | 17. | 21. | 19.6 | 1.2 |
|                                 |                                                                                                                                         |   |     |     | 9    | 15  | 1 |     |     | 4    | 04  |   | 73  | 14  | 8    | 64  |
| <i>Honanotherium schlosseri</i> | Bohlin, 1926                                                                                                                            |   |     |     |      |     | 2 | 74  | 78  | 76   | 2.8 |   |     |     |      |     |
|                                 |                                                                                                                                         |   |     |     |      |     |   |     |     |      | 2   |   |     |     |      |     |
| <i>Injanatherium arabicum</i>   | Morales et al., 1987                                                                                                                    | 3 | 360 | 401 | 380. | 20. | 3 | 37. | 39. | 38.4 | 0.9 | 3 | 9.4 | 9.9 | 9.7  | 0.3 |
|                                 |                                                                                                                                         |   |     |     | 3    | 5   |   | 87  | 6   | 4    | 9   |   | 4   | 7   |      | 6   |
| <i>Okapia johnstoni</i>         | Churcher, 1970                                                                                                                          | 1 | 316 | 335 | 324. | 6.3 | 1 | 49. | 54. | 51.3 | 1.8 | 1 | 15. | 16. | 15.8 | 0.5 |
|                                 |                                                                                                                                         | 3 | .2  |     | 3    | 3   | 3 | 2   | 08  | 8    | 5   | 3 | 14  | 81  | 4    | 1   |
| <i>Palaeotragus coelophrys</i>  | Rodler and Weithofer, 1890; Mecquenem, 1924                                                                                             | 3 | 340 | 397 | 369  | 28. | 2 | 63  | 66  | 64.5 | 2.1 | 1 | 17. | 17. | 17.8 | 0   |
|                                 |                                                                                                                                         |   |     |     |      | 51  |   |     |     |      | 2   |   | 84  | 84  | 4    |     |
| <i>Palaeotragus microdon</i>    | Bohlin, 1926                                                                                                                            |   |     |     |      |     | 1 | 46  | 46  | 46   | 0   |   |     |     |      |     |
| <i>Palaeotragus rouenii</i>     | Geraads, 1994; Kostopoulos, 2009                                                                                                        | 2 | 377 | 445 | 411  | 48. | 4 | 48. | 55  | 51.9 | 3.1 | 2 | 12. | 12. | 12.6 | 0.3 |
|                                 |                                                                                                                                         |   |     |     |      | 08  |   | 5   |     | 5    | 9   |   | 36  | 86  | 1    | 5   |
| <i>Samotherium sinense</i>      | Bohlin, 1926                                                                                                                            | 5 | 449 | 526 | 495. | 28. | 6 | 71  | 87  | 82.6 | 6.3 | 5 | 14. | 17. | 16.5 | 1.4 |
|                                 |                                                                                                                                         |   |     |     | 4    | 37  |   |     |     | 6    | 4   |   | 12  | 82  | 4    | 3   |

|                                    |                                             |        |     |     |           |           |        |          |          |           |          |        |           |           |           |          |
|------------------------------------|---------------------------------------------|--------|-----|-----|-----------|-----------|--------|----------|----------|-----------|----------|--------|-----------|-----------|-----------|----------|
| <i>Samotherium boissieri</i>       | Bohlin, 1926; Kostopoulos, 2009             | 2<br>1 | 375 | 425 | 395.<br>6 | 10.<br>15 | 1<br>6 | 60.<br>5 | 80       | 68.5<br>2 | 5.4<br>5 | 1<br>6 | 15.<br>5  | 20.<br>25 | 17.2<br>9 | 1.3<br>4 |
| <i>Samotherium major</i>           | Geraads, 1994; Kostopoulos, 2009            | 2<br>6 | 430 | 503 | 468.<br>8 | 16.<br>92 | 3<br>4 | 53.<br>6 | 92.<br>7 | 80.3<br>7 | 6.6<br>9 | 2<br>5 | 15.<br>54 | 19.<br>02 | 17.4<br>1 | 0.8<br>7 |
| <i>Samotherium neumayri</i>        | Rodler and Weithofer, 1890; Mecquenem, 1924 | 6      | 410 | 450 | 427.<br>5 | 15.<br>41 | 4      | 75       | 80       | 77.5      | 2.3<br>8 | 4      | 17.<br>67 | 19.<br>28 | 18.5<br>1 | 0.8<br>7 |
| <i>Schansitherium quadricornis</i> | Kostopoulos, 2009                           | 1      | 404 | 404 | 404       | 0         | 1      | 62       | 62       | 62        | 0        | 1      | 15.<br>35 | 15.<br>35 | 15.3<br>5 | 0        |
| <i>Sivatherium giganteum</i>       | Bohlin, 1926                                | 1      | 415 | 415 | 415       | 0         | 1      | 96       | 96       | 96        | 0        | 1      | 23.<br>13 | 23.<br>13 | 23.1<br>3 | 0        |
| <i>Sivatherium hendeyi</i>         | Harris, 1976b                               | 1      | 410 | 410 | 410       | 0         | 6      | 74       | 101      | 91.8<br>3 | 11.<br>3 | 1      | 22.<br>93 | 22.<br>93 | 22.9<br>3 | 0        |
| <i>Sivatherium olduvaense</i>      | Singer & Boné, 1960                         |        |     |     |           |           | 2      | 93       | 95       | 94        | 1.4<br>1 |        |           |           |           |          |

#### LITERATURE CITED

- Alcalá, L. 1994. Macromamíferos neógenos de la fosa de Alfambra-Teruel. PhD. dissertation, Instituto de Estudios Turolenses y Museo Nacional de Ciencias Naturales, CSIC, Teruel, 554 pp.
- Bhatti, Z. H. 2004. Taxonomy, evolutionary history and biogeography of the Siwalik giraffids (Doctoral dissertation, University of the Punjab, Lahore).
- Bhatti, Z. H., M. A. Khan and M. Akhtar. 2012. *Hydaspthierium* (Artiodactyla, Giraffidae) from the Dhok Pathan Formation of the Middle Siwaliks, Pakistan: New Collection. Pakistan Journal of Zoology 44(3):799–808.
- Bohlin, B. 1926. Die Familie Giraffidae mit besonderer Berücksichtigung der fossilen Formen aus China. Palaeontologia Sinica Series C4 (I):1–170.
- Bosscha Erdbrink, D. P. 1976. A fossil giraffine from the Maragheh region in NW Iran. Mitteilungen der Bayerischen Staatssammlung für Paläontologie und Historische Geologie 16:29–40.

- Churcher, C. 1970. Two new upper Miocene giraffids from Fort Ternan, Kenya, East Africa: *Palaeotragus primaevus* n. sp. and *Samotherium africanum* n. sp.; pp. 1–106 in L. S. B. Leakey and R. J. G. Savage (eds.), Fossil Vertebrates of Africa Volume 2. Academic Press, London and New York.
- Colbert, E. H. 1935b. Siwalik mammals in the American museum of natural history. American philosophical Society, Philadelphia, 401 pp.
- Crusafont, M. 1952. Los jiráfidos fósiles de España. Diputación Provincial de Barcelona. Memorias y comunicaciones del Instituto Geológico VIII: Premio extraordinario de Doctorado, CSIC, Barcelona, 239 pp.
- Dietrich, W. O. 1942. Älterquartäre säugetiere aus der südlichen Serengeti, Deutsch-Ostafrika. Palaeontographica XCIV(A):43–192.
- Gaudry, A., P. Fischer, and R. Tournouer. 1873. Etude sur les vertébrés; pp. 5–171 in F. Savy. (ed.), Animaux fossiles du Mont Léberon (Vaucluse). Libraire de la Societe Geologique de France.
- Geraads, D. 1979. Les Giraffinae (Artiodactyla, Mammalia) du miocène supérieur de la région de Thessalonique (Grèce). Bulletin du Muséum national d'Histoire naturelle. 4è sér. C, 1, 4:377–389.
- Geraads, D. 1989. Un nouveau giraffidé du Miocène supérieur de Macédoine (Grèce). Bulletin du Muséum national d'Histoire naturelle, 4è sér. C, 11:189–199.
- Geraads, D. 1994. Les gisements de mammifères du Miocène supérieur de Kemiklitepe, Turquie: 8. Giraffidae. Bulletin du Muséum national d'Histoire naturelle, 4è sér. C, 16:159–172.
- Geraads, D. 1998. Le gisement de vertébrés pliocènes de Çalta, Ankara, Turquie. 9. Cervidae et Giraffidae. Geodiversitas, 20(3):455–465.
- Geraads, D. 2009. Giraffidae (Mammalia) de la fin du Néogène de la République de Macédoine (ARYM). Geodiversitas 31:893–908.
- Geraads, D., T. Kaya, and S. Mayda. 2005. Late Miocene large mammals from Yulafl, Thrace region, Turkey, and their biogeographic implications. Acta Palaeontologica Polonica 50(3):523–544.
- Hamilton, W. R. 1973. The lower Miocene ruminants of Gebel Zelten, Libya. Bulletin of the British Museum (Natural History). Geology 21(3):73–150.
- Hamilton, W. R. 1978. Fossil Giraffes from the Miocene of Africa and a Revision of the Phylogeny of the Giraffoidea. Philosophical Transactions of the Royal Society of London. Series B, Biological Sciences 283:165–229.
- Harris, J. 1976a. Giraffidae from the East Rudolf succession. Earliest man and environments in the Lake Rudolf Basin; pp. 264–267 in Y. Coppens, F. C. Howell, G. L. Isaac and R. E. Leakey (eds.), Earliest Man and Environments in the Lake Rudolph Basin. Chicago University Press, Chicago.
- Harris, J. M. 1976b. Pliocene Giraffoidea (Mammalia, Artiodactyla) from the Cape Province. Annals of the South African Museum 69:325–353.
- Harris, J. M. 1991. Koobi Fora Research Project, Vol. 3: The Fossil Ungulates: Geology, Fossil Artiodactyls, and Paleoenvironments. Clarendon Press, Oxford, 383 pp.
- Khan, M. A., S. S. Butt, A. M. Khan, and M. Akhtar. 2010. A new collection of *Giraffokeryx punjabiensis* (Giraffidae, Ruminantia, Artiodactyla) from the Lehri Outcrops, Jhelum, Northern Pakistan. Pakistan Journal of Sciencei, 62:120–123.
- Khan, A. A., M. A. Khan, M. Iqbal, M. Akhtar, and M. Sarwar. 2011a. *Sivatherium* (Artiodactyla, Ruminantia, Giraffidae) from the Upper Siwaliks, Pakistan. The Journal of Animal and Plant Sciences, 21(2):202–206.
- Khan, M. A., M. Akhtar, A. M. Khan, A. Ghaffar, M. Iqbal, and K. Samiulla. 2011b. New fossil locality in the middle Miocene of lava from the Chinji Formation of the lower Siwaliks, Pakistan. Pakistan Journal of Zoology, 43(1):61–72.
- Kostopoulos, D. S. 2009. The Late Miocene Mammal Faunas of the Mytilinii Basin, Samos Island, Greece: New Collection. 13. Giraffidae. Beiträge zur Paläontologie 31:345–389.
- Kostopoulos, D. S., K. K. Koliadimou, and G. D. Koufos. 1996. The giraffids (Mammalia, Artiodactyla) from the late Miocene mammalian localities of Nikiti (Macedonia, Greece). Palaeontographica Abteilung A 239:61–88.
- Mecquenem, R., 1924–1925. Contribution a l'étude des fossiles de Maragha. Annales De Paleontologie 13:135–160; 14:1–36.

- Melentis, I. K. 1974. *Helladotherium duvernoyi* Gaudry, 1860 aus Pikermi (Griechenland). Επιστημονική Επετηρίς: εκδιδόμενη υπό της Σχολής των Φυσικών και Μαθηματικών Επιστημών (ΑΠΘ) 14:65–73.
- Montoya, P., and J. Morales. 1991. *Birgerbohlinia schaubi* Crusafont, 1952 (Giraffidae, Mammalia) del Turoliense inferior de Crevillente-2 (Alicante, España). Filogenia e historia biogeográfica de la subfamilia Sivatheriinae. Bulletin du Muséum National d'Histoire Naturelle, Paris, 4° sér., 13:177–200.
- Morales, J., D. Soria, and H. Thomas. 1987. Les Giraffidae (Artiodactyla, Mammalia) D'Al Jadidah du Miocène Moyen de la Formation Hofuf (Province du Hasa, Arabie Saoudite). Geobios 20:441–467.
- Pilgrim, G. E. 1911. The Fossil giraffidae of India. Geological Survey of India 4:1–29.
- Robinson, C. A. 2011. Chapter 14. Giraffidae; pp. 339–362 in T. Harrison (ed.) Paleontology and Geology of Laetoli: Human Evolution in Context: Volume 2: Fossil Hominins and the Associated Fauna. Springer Science and Business Media, Dordrecht.
- Rodler, A., and C. A. Weithofer. 1890. Die Wiederkäuer der Fauna von Maragha. Denkschrift Akademische Wissenschaft, Wien 57:753–572.
- Roussiakis, S., and G. Iliopoulos. 2004. Preliminary observations on the metrical variation of *Helladotherium duvernoyi* and *Bohlinia attica*. 5th International Symposium on Eastern Mediterranean Geology, Thessaloniki.
- Schlosser, M. 1903. Die fossilen Säugetiere Chinas. Abhandlungen der Königlichen Bayerische Akademie der Wissenschaften II:1–22.
- Singer, R., and E. Boné. 1960. Modern giraffes and the fossil giraffids of Africa. Annals of the South Africa Museum 45:375–548.
