# Supplementary material
Source: publisher figshare collection journal article supplement (https://tandf.figshare.com/articles/dataset/_/3443402)
Supplement: Supplementary file 2 [file 2]

SUPPLEMENTARY DATA 1

Comparative anatomy, phylogeny and systematics of the Miocene giraffid *Decennatherium pachecoi* Crusafont, 1952 (Mammalia, Ruminantia, Pecora): state of the art

MARIA RIOS,<sup>\*</sup> ISRAEL M. SÁNCHEZ, and JORGE MORALES

Departamento de Paleobiología, Museo Nacional de Ciencias Naturales-CSIC, C/ José

Gutiérrez Abascal, 2, 28006 Madrid, Spain, maria.rios.iba@mncn.csic.es;

micromeryx@gmail.com; mcnm166@mncn.csic.es

<sup>\*</sup>Corresponding author.

SUPPLEMENTARY DATA 1. Dimensions (in mm) of the dentition and postcranial skeleton of *Decennatherium pachecoi* from Los Valles de Fuentidueña, Nombrevilla, Relea, Pedrajas de San Esteban (Crusafont, 1952, Montoya and Morales, 1991), Masia del Barbo, Masia de La Roma (Alcalá, 1994) and Campisabalos (Crusafont, 1966). **Abbreviations:** **LVF**, Los Valles de Fuentidueña; **MB**, Masia del Barbo; **MR**, Masia de la Roma; **NOM**, Nombrevilla; **PEDR**, Pedrajas de San Esteban; **REL**, Relea.

TABLE 1S. Dimensions of the deciduous dentition of *D. pachecoi* in mm.

| Locality | Specimen nº/Reference | Length | Width |
|----------|-----------------------|--------|-------|
| d2       |                       |        |       |
| NOM      | Crusafont, 1952       | 24.3   | 13.3  |
| NOM      | Crusafont, 1952       | 20.5   | 12.5  |
| d3       |                       |        |       |
| LVF      | MNCN-43450            | 23.69  | 11.99 |
| LVF      | MNCN-43451            |        | 12.27 |
| d4       |                       |        |       |
| LVF      | MNCN-43450            | 38.09  | 15.4  |
| LVF      | MNCN-43451            | 24.35  | 18.33 |
| LVF      | MNCN-32052            | 37.24  |       |

TABLE 2S. Dimensions of the lower permanent dentition of *D. pachecoi* in mm.

| Locality | Specimen nº/Reference | Length | Width |
|----------|-----------------------|--------|-------|
| p2       |                       |        |       |
| MB       | Alcalá, 1994          | 25     | 13.3  |
| NOM      | Crusafont, 1952       | 27.5   | 13.7  |
| NOM      | Crusafont, 1952       | 27     | 14    |
| NOM      | Crusafont, 1952       | 26.7   | 14.4  |
| NOM      | Crusafont, 1952       | 25.8   | 15    |
| NOM      | Crusafont, 1952       | 27.1   | 16.4  |
| NOM      | Crusafont, 1952       | 26.4   | 13.9  |
| NOM      | Crusafont, 1952       | 24     | 13.2  |
| NOM      | Crusafont, 1952       | 26.1   | 14.6  |

|     |                 |       |       |
|-----|-----------------|-------|-------|
| LVF | MNCN-43452      | 27.19 | 14.38 |
| LVF | MNCN-43453      | 24.24 | 13    |
| LVF | MNCN-43454      | 23.39 | 12.92 |
| LVF | MNCN-43455      | 24.17 | 15.21 |
| LVF | MNCN-43456      |       | 13.66 |
| LVF | MNCN-43457      | 25.51 |       |
| LVF | MNCN-43458      |       | 13.78 |
| LVF | MNCN-43459      |       | 14.71 |
| LVF | MNCN-43460      | 22.52 | 14.21 |
| LVF | MNCN-32288      | 23.44 | 13.81 |
| p3  |                 |       |       |
| LVF | MNCN-43463      | 28.15 | 18.29 |
| LVF | MNCN-43465      | 28.62 | 17.23 |
| NOM | Crusafont, 1952 | 28.7  | 17.5  |
| LVF | MNCN-43467      | 28.86 | 17.27 |
| LVF | Crusafont, 1952 | 29    | 16.5  |
| LVF | MNCN-43462      | 29.14 | 16.36 |
| LVF | MNCN-43464      | 29.33 | 17.2  |
| LVF | MNCN-43468      | 29.58 | 17.38 |
| NOM | Crusafont, 1952 | 30    | 18.5  |
| NOM | Crusafont, 1952 | 30    | 17.1  |
| LVF | MNCN-43466      | 30.06 | 17.23 |
| LVF | MNCN-43461      | 30.68 | 18.2  |
| NOM | Crusafont, 1952 | 31.2  | 18    |
| NOM | Crusafont, 1952 | 31.5  | 20    |
| NOM | Crusafont, 1952 | 31.6  | 21.3  |
| p4  |                 |       |       |
| MB  | Alcalá, 1994    | 28.1  | 17.5  |
| NOM | Crusafont, 1952 | 32.7  | 21.7  |

|     |                 |       |       |
|-----|-----------------|-------|-------|
| NOM | Crusafont, 1952 | 32.2  | 22.5  |
| NOM | Crusafont, 1952 | 33.5  | 22.2  |
| NOM | Crusafont, 1952 | 32.5  | 22.5  |
| NOM | Crusafont, 1952 | 35    | 21    |
| NOM | Crusafont, 1952 | 32    | 20    |
| NOM | Crusafont, 1952 | 34    | 21    |
| NOM | Crusafont, 1952 | 33.2  | 23.7  |
| LVF | MNCN-43448      | 27.73 | 19.19 |
| LVF | MNCN-43449      |       | 25.05 |
| LVF | MNCN-43469      | 33.5  | 24.52 |
| m1  |                 |       |       |
| NOM | Crusafont, 1952 | 34.5  | 27    |
| NOM | Crusafont, 1952 | 37.7  | 26.1  |
| NOM | Crusafont, 1952 | 37.5  |       |
| NOM | Crusafont, 1952 | 38    | 27    |
| NOM | Crusafont, 1952 | 36.5  | 25    |
| NOM | Crusafont, 1952 | 38    | 25    |
| NOM | Crusafont, 1952 | 38.4  | 28.5  |
| LVF | Crusafont, 1952 | 38.6  | 24.6  |
| LVF | MNCN-43448      | 29.07 |       |
| LVF | MNCN-43449      | 32.41 | 25.85 |
| LVF | MNCN-43450      | 32.16 |       |
| LVF | MNCN-43476      | 37.28 | 24.39 |
| LVF | MNCN-43477      | 34.84 | 20.87 |
| LVF | MNCN-43478      | 36.4  | 24.28 |
| LVF | MNCN-43479      | 36.15 | 24.08 |
| LVF | MNCN-43480      | 35.71 | 25.19 |
| m2  |                 |       |       |
| NOM | Crusafont, 1952 | 41.2  | 29    |
| NOM | Crusafont, 1952 | 42.8  | 27.8  |

|     |                 |       |       |
|-----|-----------------|-------|-------|
| NOM | Crusafont, 1952 | 42.5  | 28.9  |
| NOM | Crusafont, 1952 | 40    | 28    |
| LVF | MNCN-43449      | 38.7  | 26.94 |
| LVF | MNCN-43481      | 40.49 | 27.41 |
| LVF | MNCN-43482      | 38.68 | 27.17 |
| m3  |                 |       |       |
| NOM | Crusafont, 1952 | 56.6  | 28.7  |
| REL | Crusafont, 1952 | 47.5  | 24    |
| NOM | Crusafont, 1952 | 52.5  | 26.2  |
| NOM | Crusafont, 1952 | 50    | 24.3  |
| NOM | Crusafont, 1952 | 55    | 26.7  |
| NOM | Crusafont, 1952 | 56    | 27    |
| NOM | Crusafont, 1952 | 54    | 25.5  |
| NOM | Crusafont, 1952 | 56    | 25    |
| NOM | Crusafont, 1952 | 54.05 | 25.77 |
| LVF | MNCN-43483      | 56.49 | 22.09 |
| LVF | MNCN-43449      |       |       |

TABLE 3S. Dimensions of the upper permanent dentition of *D. pachecoi* in mm.

| Locality | Specimen nº/Reference | Length | Width |
|----------|-----------------------|--------|-------|
| P4       |                       |        |       |
| NOM      | Crusafont, 1952       | 27.5   |       |
| NOM      | Crusafont, 1952       | 30     | 34.2  |
| REL      | Crusafont, 1952       | 26.5   | 33.3  |
| PEDR     | Crusafont, 1952       | 27     | 34    |
| NOM      | Crusafont, 1952       | 25     |       |
| LVF      | MNCN-43489            | 25.51  | 33.15 |
| M1       |                       |        |       |
| REL      | Crusafont, 1952       | 40     | 37    |

|      |                 |       |       |
|------|-----------------|-------|-------|
| REL  | Crusafont, 1952 | 40    | 37    |
| NOM  | Crusafont, 1952 | 39    |       |
| PEDR | Crusafont, 1952 | 36    |       |
| LVF  | MNCN-43490      | 33.45 | 33.71 |
| M2   |                 |       |       |
| NOM  | Crusafont, 1952 | 45    | 41.7  |
| NOM  | Crusafont, 1952 | 43    | 41.3  |
| REL  | Crusafont, 1952 | 40    | 38    |
| PEDR | Crusafont, 1952 | 37    |       |
| LVF  | MNCN-43490      | 36.23 | 33.97 |
| M3   |                 |       |       |
| NOM  | Crusafont, 1952 | 43.5  | 39.4  |
| NOM  | Crusafont, 1952 | 41    | 37.2  |
| NOM  | Crusafont, 1952 | 40    | 36.5  |
| PEDR | Crusafont, 1952 | 39    |       |
| LVF  | MNCN-43496      | 37.33 | 35.51 |

TABLE 4S. Dimensions of the canines of *D. pachecoi* in mm.

| Locality | Specimen n°/Reference | Reference | Length | Width |
|----------|-----------------------|-----------|--------|-------|
| NOM      | Crusafont, 1952       |           | 22     | 25    |
| NOM      | Crusafont, 1952       |           | 23     | 25    |
| NOM      | Crusafont, 1952       |           | 17     | 28    |
| NOM      | Crusafont, 1952       |           | 21     | 27    |
| NOM      | Crusafont, 1952       |           | 21.2   | 22    |
| PEDR     | Crusafont, 1952       |           | 19     | 23    |

TABLE 5S. Dimensions of the incisors of *D. pachecoi* in mm. **Abbreviations:** **max**, maximum value; **min**, minimum value; **N**, number of specimens; **SD**, standard deviation.

| Locality | Specimen/Reference n° | Length | Width |
|----------|-----------------------|--------|-------|
| NOM      | Crusafont, 1952       | 14.8   | 23.5  |

|      |                 |      |      |
|------|-----------------|------|------|
| NOM  | Crusafont, 1952 | 14.1 | 23.3 |
| PEDR | Crusafont, 1952 |      | 20   |
| NOM  | Crusafont, 1952 | 17   | 28   |
| NOM  | Crusafont, 1952 | 16.5 | 26.5 |
| NOM  | Crusafont, 1952 | 15.8 | 27.1 |
| NOM  | Crusafont, 1952 | 16.9 | 27.6 |
| NOM  | Crusafont, 1952 | 16.4 | 27.7 |
| NOM  | Crusafont, 1952 | 17   | 26.5 |
| PEDR | Crusafont, 1952 | 14.8 | 25   |
| NOM  | Crusafont, 1952 | 20   | 27   |
| NOM  | Crusafont, 1952 | 17.3 | 28.7 |
| NOM  | Crusafont, 1952 | 18.5 | 28.6 |
| NOM  | Crusafont, 1952 | 18.2 | 27.9 |
| NOM  | Crusafont, 1952 | 17.3 | 29.5 |
| NOM  | Crusafont, 1952 | 19   | 30   |
| NOM  | Crusafont, 1952 | 17.5 | 29   |
| PEDR | Crusafont, 1952 | 17   | 25   |
| NOM  | Crusafont, 1952 | 15.5 | 22.6 |

TABLE 6S. Dimensions of the scapula of *D. pachecoi* in mm. **Abbreviations:** **APD**, anteroposterior diameter; **DT**, transversal diameter; **Glen. Cav**, glenoid cavity.

| Specimen<br>n° | Min. neck APD | Distal DT | Distal APD | Glen. cav. APD |
|----------------|---------------|-----------|------------|----------------|
| MNCN-<br>30783 | 90.67         | 57.37     | 127.21     | 86.54          |

TABLE 7S. Dimensions of the humerus of *D. pachecoi* in mm. **Abbreviations:** **APD**, anteroposterior diameter; **Diaph**, diaphysis; **DT**, transversal diameter.

| Specimen<br>n° | Total<br>length | Functional<br>length | Diaph.<br>TD | Diaph.<br>APD | Distal<br>TD | Distal<br>APD | Proximal<br>TD | Proximal<br>APD | Trochlea<br>APD |
|----------------|-----------------|----------------------|--------------|---------------|--------------|---------------|----------------|-----------------|-----------------|
|----------------|-----------------|----------------------|--------------|---------------|--------------|---------------|----------------|-----------------|-----------------|

|            |        |        |       |       |        |        |        |        |       |
|------------|--------|--------|-------|-------|--------|--------|--------|--------|-------|
| MNCN-30762 |        |        | 53.69 | 55.74 | 103.42 | 89.98  |        |        | 55.07 |
| MNCN-30764 |        |        |       |       | 112.49 | 70.79  |        |        | 50.08 |
| MNCN-30765 |        |        |       |       | 99.91  | 60.16  |        |        | 42.72 |
| MNCN-30774 | 405.37 | 379.58 | 61.49 | 64.39 | 105.66 | 106.79 | 127.64 | 139.38 | 51.59 |
| MNCN-30763 |        |        | 49.34 | 59.65 | 98.05  | 90.22  |        |        | 46.13 |
| MNCN-43564 |        |        |       |       |        |        |        |        | 46.1  |
| MNCN-30766 |        |        | 52.46 | 63.78 |        |        |        |        |       |

TABLE 8S Dimensions of the radius-ulna of *D. pachecoi* in mm. **Abbreviations:** **Anc. Proc.**, anconeal process; **APD**, anteroposterior diameter; **Diaph**, diaphysis; **DT**, transversal diameter; **Olec**, olecranon.

| Specimen n° | Total Length | Diaph. TD | Diaph. APD | Distal TD | Distal APD | Proximal TD | Proximal APD | Olec. APD | Olec. Min. APD | Olec. Length | Anc. Proc. APD |
|-------------|--------------|-----------|------------|-----------|------------|-------------|--------------|-----------|----------------|--------------|----------------|
| MNCN-30784  |              | 55.93     | 38.32      |           |            | 93.29       | 53.36        |           |                |              |                |
| MNCN-43419  |              |           |            |           |            |             |              | 77.6      | 86.18          | 134          | 104.26         |
| MNCN-43418  |              | 54.23     | 42.78      |           |            |             |              |           |                |              |                |
| MNCN-43417  |              | 51.88     | 38.71      | 93.07     | 57.27      |             |              |           |                |              |                |

TABLE 9S. Dimensions of the carpals of *D. pachecoi* in mm. **Abbreviations:** **APD**, anteroposterior diameter; **DT**, transversal diameter.

| Scaphoid    |                 |             |       |
|-------------|-----------------|-------------|-------|
| Specimen n° | Anterior Height | Proximal TD | APD   |
| MNCN-42623  | 35.15           | 29.56       | 55.37 |



|             |                 |             |           |
|-------------|-----------------|-------------|-----------|
| MNCN-42621  | 36.83           |             |           |
| MNCN-42620  | 37.72           | 28.87       | 58.82     |
| MNCN-42613  | 36.29           | 23.48       | 50.32     |
| MNCN-42612  | 37.2            | 28.17       | 56.9      |
| MNCN-42610  | 37.67           | 28.94       | 54.24     |
| MNCN-42609  | 38.37           | 29.96       | 59.88     |
| MNCN-42608  | 41.78           | 34.48       | 59.38     |
| MNCN-32355  | 39.56           | 28.76       | 60.72     |
| MNCN-42624  | 37.95           | 31.16       | 55.76     |
| MNCN-42622  | 33.99           |             | 48.27     |
| MNCN-42618  | 37.08           | 27.68       | 55.19     |
| MNCN-42617  | 34.99           | 31.41       | 59.03     |
| MNCN-42616  | 36.52           | 26.44       | 55.8      |
| MNCN-42615  | 38.55           | 26.54       | 53.24     |
| MNCN-42614  | 37.34           | 30.79       |           |
| MNCN-42611  | 39.78           | 26.24       | 57.9      |
| MNCN-42619  | 37.78           | 22.33       | 53.64     |
| Semilunate  |                 |             |           |
| Specimen n° | Anterior Height | Proximal TD | Distal TD |
| MNCN-54854  | 35.76           | 30.12       |           |
| MNCN-43581  | 36.83           | 31.5        | 28.24     |
| MNCN-42606  | 38.28           | 37.13       | 31.41     |
| MNCN-42605  | 36.98           | 36.66       | 23.5      |
| MNCN-42604  | 35.15           | 33.66       | 25.25     |
| MNCN-42603  | 38.83           | 34.69       |           |
| MNCN-42601  | 38.01           | 28.45       | 30.28     |
| MNCN-42600  | 36.47           | 34.13       |           |
| MNCN-43562  | 35.66           | 31.91       | 27.95     |

|             |                  |                |       |
|-------------|------------------|----------------|-------|
| MNCN-42607  | 40.15            | 37.66          | 31.85 |
| MNCN-42602  | 39.94            | 35.92          | 28.75 |
| MNCN-42599  | 37.35            | 34.61          |       |
| MNCN-42598  | 36.85            | 33.07          |       |
| MNCN-42597  | 34.69            | 33.4           | 28.95 |
| MNCN-42596  | 35.88            | 34.38          | 26.76 |
| Pyramidal   |                  |                |       |
| Specimen nº | Anterior Height  | Maximum Height | TD    |
| MNCN-42638  | 39.13            | 50.08          | 33.39 |
| MNCN-42635  | 40.46            |                | 36.62 |
| MNCN-42633  | 39.97            | 46.54          | 30.49 |
| MNCN-42630  | 38.21            | 51.64          | 31.02 |
| MNCN-42629  | 41.13            | 51.99          | 34.58 |
| MNCN-42627  | 41.2             | 50.66          | 27.18 |
| MNCN-32077  | 38.86            | 53.71          | 35.96 |
| MNCN-43563  | 38.74            | 53.39          | 33.32 |
| MNCN-42637  | 39.61            | 50.4           | 32.81 |
| MNCN-42636  | 45.69            |                | 42.8  |
| MNCN-42634  | 38.28            |                | 34.18 |
| MNCN-42631  | 38.3             | 49.93          | 32.59 |
| MNCN-42628  | 36.61            | 50.86          | 34.44 |
| MNCN-42626  | 39.72            | 55.28          | 25.56 |
| MNCN-42625  | 40.17            | 55.07          | 32.9  |
| MNCN-42632  | 34.94            | 46.64          | 21.12 |
| Pisiform    |                  |                |       |
| Specimen nº | Posterior Height | APD            |       |
| MNCN-42734  | 32.25            | 39.88          |       |

|                |                 |                     |                    |
|----------------|-----------------|---------------------|--------------------|
| MNCN-42732     | 28.17           | 36.31               |                    |
| MNCN-42731     | 30.03           | 40                  |                    |
| MNCN-54851     | 29.74           | 38.32               |                    |
| MNCN-42733     | 29.96           | 35.19               |                    |
| Magnotrapezoid |                 |                     |                    |
| Specimen nº    | Anterior TD     | Posterior TD        | APD                |
| MNCN-54852     | 20.09           |                     |                    |
| MNCN-43587     |                 | 39.71               | 53.15              |
| MNCN-42649     | 48.45           | 42.11               | 52.26              |
| MNCN-42647     | 45.21           | 39.28               | 47.81              |
| MNCN-42645     | 46.02           | 40.14               | 49.27              |
| MNCN-42644     | 43.24           |                     | 49.2               |
| MNCN-42643     | 48.83           | 43.09               | 49.84              |
| MNCN-42639     | 50.75           | 43.15               | 56.19              |
| MNCN-43585     | 47.99           | 36.22               | 45.98              |
| MNCN-43586     | 47.25           | 40.39               | 51.24              |
| MNCN-42648     | 48.65           | 42.85               | 53.4               |
| MNCN-42646     | 45.88           | 36.45               | 47.84              |
| MNCN-42642     |                 |                     | 48.5               |
| MNCN-42641     | 48.77           |                     |                    |
| MNCN-42640     | 48.95           | 39.94               | 51.27              |
| MNCN-32290     |                 |                     | 45.42              |
| Unciform       |                 |                     |                    |
| Specimen nº    | Anterior Height | Semilunate Facet TD | Pyramidal Facet TD |
| MNCN-43569     | 27.2            | 11.49               | 23.11              |
| MNCN-32294     | 29.21           | 11.06               | 22.18              |
| MNCN-42591     | 27.69           | 12.9                | 23.44              |

|            |       |       |       |
|------------|-------|-------|-------|
| MNCN-42590 | 26.91 | 13.73 | 23.47 |
| MNCN-42588 | 27.46 | 13.2  | 25.24 |
| MNCN-42586 | 28.24 | 14.21 | 27.26 |
| MNCN-42585 | 26.35 | 12.98 | 24.22 |
| MNCN-43770 | 27.29 | 12.08 | 22.61 |
| MNCN-32289 | 29.35 | 12.71 | 24.1  |
| MNCN-42589 | 27.83 | 12.15 | 24.6  |
| MNCN-42587 | 28.28 | 13.3  | 28.35 |
| MNCN-42584 | 27.08 | 13.12 | 26.09 |
| MNCN-42583 | 27.42 | 10.89 | 27.57 |
| MNCN-42582 | 28.72 | 12.3  | 29.22 |

TABLE 10S. Dimensions of the metacarpal III-IV of *D. pachecoi* in mm. **Abbreviations:** **APD**, anteroposterior diameter; **Diaph**, diaphysis; **DT**, transversal diameter.

| Localit<br>y | Specime<br>n n°<br>/Referen<br>ce | Total<br>Lengt<br>h | Proxim<br>al TD | Proxim<br>al APD | Diap<br>h. TD | Diap<br>h.<br>APD | Dist<br>al<br>TD | Dist<br>al<br>APD | Unifor<br>m facet<br>TD | Magnotrapez<br>oid facet TD |
|--------------|-----------------------------------|---------------------|-----------------|------------------|---------------|-------------------|------------------|-------------------|-------------------------|-----------------------------|
| LVF          | MNCN-<br>42769                    | 391                 | 73.32           | 50.23            | 36.17         | 40.14             | 73.7<br>8        | 45.3<br>1         | 25.72                   | 44.64                       |
| NOM          | Cruafont,<br>1952                 |                     | 90              | 60               | 44.5          | 53                |                  |                   |                         |                             |

TABLE 11S. Dimensions of the femur of *D. pachecoi* in mm. **Abbreviations:** **APD**, anteroposterior diameter; **Diaph**, diaphysis; **DT**, transversal diameter; **Troc**, trochlea.

| Specimen n° | Total<br>length | Distal<br>TD | Distal<br>APD |
|-------------|-----------------|--------------|---------------|
| MNCN-42776  | 82.09           | 81.15        | 32.71         |
| MNCN-42777  |                 |              |               |

TABLE 12S. Dimensions of the tibia of *D. pachecoi* in mm. **Abbreviations:** **APD**, anteroposterior diameter; **Diaph**, diaphysis; **DT**, transversal diameter; **Fun**, functional.

| Specimen | Total | Diaph. | Diaph. | Distal | Distal | Proximal | Proximal | Fun.<br>Distal | Fun.<br>Distal |
|----------|-------|--------|--------|--------|--------|----------|----------|----------------|----------------|
|----------|-------|--------|--------|--------|--------|----------|----------|----------------|----------------|

| n°         | length | TD    | APD   | TD    | APD   | TD     | APD    | TD    | APD   |
|------------|--------|-------|-------|-------|-------|--------|--------|-------|-------|
| MNCN-42772 |        | 52.07 | 39.2  |       | 61.51 |        |        | 53.84 | 47.81 |
| MNCN-42773 |        | 52.69 | 40.9  | 78.92 | 60.65 |        |        | 55.88 | 45.54 |
| MNCN-42775 |        |       |       | 72.02 | 58.75 |        |        | 55.11 | 46.8  |
| MNCN-30785 |        | 53.91 | 42.97 | 80.35 | 62.97 |        |        | 57.74 | 50.56 |
| MNCN-42774 |        |       |       | 81.73 | 63.35 |        |        | 56.08 | 49.08 |
| MNCN-30775 | 497.78 | 59.03 | 37.49 | 82.74 | 65.47 | 121.68 | 126.89 | 57.38 | 52.47 |

TABLE 13S. Dimensions of the tarsals of *D. pachecoi* in mm. **Abbreviations:** **APD**, anteroposterior diameter; **Diaph**, diaphysis; **DT**, transversal diameter; **s**, sustentaculum; **t.c**, tuber calcis.

| Malleolar   |                |       |       |                  |       |
|-------------|----------------|-------|-------|------------------|-------|
| Specimen n° | Maximum Height | APD   | TD    | Posterior Height |       |
| MNCN-43566  | 33.67          | 44.81 | 21.06 | 26.67            |       |
| MNCN-32353  | 29.1           | 42.38 | 19.36 | 26               |       |
| MNCN-42592  | 31.7           | 45.36 | 21.29 | 30.61            |       |
| MNCN-42577  | 30.08          | 45.93 | 21.33 | 27.86            |       |
| MNCN-42575  |                | 39.61 | 18.36 | 26.15            |       |
| MNCN-43565  | 29.71          | 43.29 | 20.57 | 26.3             | 24.43 |
| MNCN-32352  | 32.35          | 42.1  | 19.89 | 25.7             |       |
| MNCN-32354  | 31.06          | 43.49 | 19.01 | 25.94            |       |
| MNCN-       | 32.19          | 44.24 | 20.02 | 28.53            |       |

|             |              |         |          |           |            |           |       |                           |
|-------------|--------------|---------|----------|-----------|------------|-----------|-------|---------------------------|
| 42595       |              |         |          |           |            |           |       |                           |
| MNCN-42594  | 29.78        | 44.59   | 22.32    | 27.79     |            |           |       |                           |
| MNCN-42593  | 28.39        | 42.94   | 22.98    | 28.96     |            |           |       |                           |
| MNCN-42580  |              | 44.05   | 19.15    | 29.26     |            |           |       |                           |
| MNCN-42579  |              | 42.13   | 21.37    | 27.53     |            |           |       |                           |
| MNCN-42578  | 29.17        | 45.69   | 20.59    | 29.18     |            |           |       |                           |
| MNCN-42576  | 29.19        | 43.86   | 21.06    | 27.5      |            |           |       |                           |
| Calcaneus   |              |         |          |           |            |           |       |                           |
| Specimen nº | Total Length | t.c. TD | t.c. APD | Diaph. TD | Diaph. APD | s. Length | s. TD | Anterior Articulation APD |
| MNCN-43631  |              | 39.42   | 44.72    | 23.84     | 45.75      | 114.66    | 44.31 |                           |
| MNCN-42741  | 179.36       | 38.47   | 46.92    | 23.69     | 46.95      | 120.63    | 57.27 | 70.41                     |
| MNCN-42742  |              |         |          | 23.79     | 46.87      |           | 54.59 | 65.63                     |
| MNCN-43630  | 184.41       | 45.21   | 53.36    | 30.24     | 49.35      | 124.83    | 50.72 | 75.92                     |
| MNCN-42736  | 147.76       | 33.09   | 36.95    | 26.91     | 45.84      | 87.1      | 52.39 | 66.41                     |
| MNCN-42737  | 166.36       | 33.85   |          | 25.99     | 44.9       | 114.71    | 61.77 | 69.51                     |
| MNCN-42738  | 176.2        | 39.94   | 48.6     | 26.28     | 47.86      | 119.31    | 57.25 | 72.29                     |
| MNCN-42739  |              | 33.03   | 35.17    | 26.3      | 42.45      | 93.25     | 53.87 |                           |
| MNCN-42740  |              | 32.41   | 36.8     | 23.16     | 45.63      | 109.09    | 59.13 |                           |
| MNCN-42743  |              |         |          | 23.85     | 44.89      |           | 60.2  |                           |

| MNCN-43632            |               | 40.39          | 44.84      |             |           |
|-----------------------|---------------|----------------|------------|-------------|-----------|
| MNCN-43633            |               | 43.49          | 48.93      |             |           |
| Astragalus            |               |                |            |             |           |
| Specimen n°/Reference | Medial Length | Lateral Length | Medial APD | Lateral APD | Distal DT |
| MNCN-42562            |               |                |            |             |           |
| MNCN-43556            | 78.96         |                | 51.67      | 46.78       | 52.56     |
| MNCN-43554            | 74.09         | 87.9           | 52.94      | 51.4        | 55.27     |
| MNCN-43553            | 72.85         | 84.04          | 46.41      | 49.82       | 55.12     |
| MNCN-43552            | 79.54         | 81.11          | 43.77      | 45.03       | 51.55     |
| MNCN-43546            | 83.37         | 90.95          | 52.31      | 54.03       | 54.8      |
| MNCN-43545            | 77.73         |                | 41.88      |             | 49.23     |
| MNCN-43544            | 72.41         | 82.08          | 48.51      | 47.47       | 51.44     |
| MNCN-43543            | 73.88         | 79.54          |            |             |           |
| MNCN-42564            | 77.05         | 85.62          | 48.87      | 47.84       | 54.01     |
| MNCN-32716            |               |                |            |             |           |
| MNCN-32068            | 80.63         | 88.1           | 44.75      | 47.11       | 50.67     |
| MNCN-43558            | 76.72         | 86.29          | 45.97      | 44.14       | 49.47     |
| MNCN-43557            | 71.95         | 80.71          | 40.42      |             | 50.44     |

|                  |       |       |                 |                    |                |                  |                      |
|------------------|-------|-------|-----------------|--------------------|----------------|------------------|----------------------|
| MNCN-43555       |       | 80.55 |                 | 48.31              |                |                  |                      |
| MNCN-43551       | 77.59 | 81.47 | 47.88           | 46.32              | 55.4           |                  |                      |
| MNCN-43550       | 78.36 | 85.94 | 44.3            | 45.6               | 52.51          |                  |                      |
| MNCN-43549       | 75.74 | 85.28 | 47.81           | 44.24              | 53.45          |                  |                      |
| MNCN-43548       | 77.88 | 79.39 | 40.89           | 36.37              | 46.29          |                  |                      |
| MNCN-43547       | 78.56 | 86.21 | 44.82           | 45.59              | 51.41          |                  |                      |
| MNCN-42563       | 76.01 | 85.21 | 48.52           | 44.35              | 51.12          |                  |                      |
| MNCN-42561       | 75.53 | 84.57 | 46.15           | 43.57              | 51.31          |                  |                      |
| MNCN-42559       | 80.06 | 87.4  | 48.57           | 50.33              | 54.59          |                  |                      |
| Crusafont, 1966  |       | 90.5  |                 |                    | 66             |                  |                      |
| Crusafont, 1952  |       | 86    |                 |                    | 57             |                  |                      |
| Crusafont, 1952  |       | 91    |                 |                    | 60             |                  |                      |
| Crusafont, 1952  |       | 89    |                 |                    | 60             |                  |                      |
| Crusafont, 1952  |       |       |                 |                    | 59.7           |                  |                      |
| Crusafont, 1952  |       | 86.5  |                 |                    | 56.5           |                  |                      |
| Crusafont, 1952  |       | 92    |                 |                    | 59.5           |                  |                      |
| Crusafont, 1952  |       | 92    |                 |                    |                |                  |                      |
| Navicular-cuboid |       |       |                 |                    |                |                  |                      |
| Specimen nº      | TD    | APD   | Cuboid Anterior | Navicular Anterior | Total Anterior | Posterior Height | Astragalus Articular |



|                  |                 |       | r Height | Height | Height |       | Facet TD |
|------------------|-----------------|-------|----------|--------|--------|-------|----------|
| MNCN-42658       | 65.67           |       | 29.13    | 19.98  | 36.53  |       | 51.28    |
| MNCN-42657       | 64.71           | 71.08 | 34.81    | 21.73  | 34.51  | 54.68 | 54.15    |
| MNCN-42652       | 67.75           | 71.95 | 32.79    | 20.51  | 39.46  | 48.01 | 54.59    |
| MNCN-42735       |                 |       | 29.63    |        |        |       |          |
| MNCN-32715       | 63.89           | 62.81 | 30.22    | 21.4   | 40.2   | 42.7  |          |
| MNCN-42659       |                 | 71    |          | 22.04  |        | 52.13 |          |
| MNCN-42656       | 73.81           | 79.88 | 34.36    | 23.85  | 43.2   | 55.64 | 54.47    |
| MNCN-42655       | 67.4            |       | 31.21    | 20.99  | 38.11  | 53.41 | 54.45    |
| MNCN-42654       | 66.17           |       | 31.85    | 22.26  | 37.4   |       | 51.19    |
| MNCN-42653       | 70.21           |       | 35.27    | 23.65  | 44.08  |       | 54.75    |
| MNCN-42651       | 74.05           | 76.04 | 35.73    | 23.23  | 42.91  |       | 57.31    |
| MNCN-42650       | 70.17           | 64.7  | 29.24    | 20.14  | 38.73  | 56.29 | 54.89    |
| Ectomesocneiform |                 |       |          |        |        |       |          |
| Specimen nº      | Anterior Height | TD    | APD      |        |        |       |          |
| MNCN-43603       | 16.8            | 30.55 | 50.42    |        |        |       |          |
| MNCN-43604       | 13.9            | 24.91 | 42.76    |        |        |       |          |
| MNCN-32304       | 17.65           | 27.76 | 43.78    |        |        |       |          |
| MNCN-42574       | 14.49           | 28.29 | 43.06    |        |        |       |          |

|            |       |       |       |
|------------|-------|-------|-------|
| MNCN-42573 | 15.74 | 29.46 | 49.73 |
| MNCN-42572 | 17.35 | 29.82 | 48.11 |
| MNCN-42570 | 18.3  | 29.94 | 49.76 |
| MNCN-42567 | 15.38 | 26.95 |       |
| MNCN-42566 | 16.7  | 28.35 | 45.77 |
| MNCN-42565 | 15.2  | 29.08 | 46.69 |
| MNCN-42571 | 16.64 | 27.78 | 44.59 |
| MNCN-42569 | 16.58 | 28.95 | 46.83 |
| MNCN-42568 | 16.9  | 30.58 | 47.51 |

TABLE 14S. Dimensions of the metatarsal III-IV of *D. pachecoi* in mm. **Abbreviations:** **APD**, anteroposterior diameter; **Diaph**, diaphysis; **DT**, transversal diameter; **Fun**, functional.

| Locality | Specimen<br>n°/Reference | Total<br>Length | Diaph.<br>TD | Diaph.<br>APD | Distal<br>TD | Distal<br>APD | Proximal<br>TD | Proximal<br>APD |
|----------|--------------------------|-----------------|--------------|---------------|--------------|---------------|----------------|-----------------|
| LVF      | MNCN-42764               | 427.5           | 35.35        | 40.64         | 66.39        | 42.29         | 60.84          | 63.88           |
| LVF      | MNCN-42765               | 406.14          | 42.46        | 38.36         | 76.92        | 47.54         | 74.12          | 66.36           |
| LVF      | MNCN-42771               |                 | 38.4         | 39.27         |              | 43.79         |                |                 |
| LVF      | MNCN-42778               |                 | 34.94        | 42.9          |              |               | 59.68          | 57.65           |
| LVF      | MNCN-42770               |                 | 36.17        | 46.43         |              |               |                | 56.53           |
| LVF      | MNCN-42766               |                 | 36.59        | 38.57         |              |               |                | 54.73           |
| LVF      | MNCN-42767               |                 | 35.88        | 38.57         |              |               | 57.42          | 60.49           |
| LVF      | MNCN-42768               |                 | 33.38        | 36.22         |              |               | 59.36          | 62.36           |
| REL      | Crusafont, 1952          |                 | 40           | 47            |              |               | 66             | 67              |
| REL      | Crusafont, 1952          |                 |              |               |              |               | 59             | 60.5            |

TABLE 15S. Dimensions of the phalanges of *D. pachecoi* in mm. **Abbreviations:** **APD**, anteroposterior diameter; **Diaph**, diaphysis; **DT**, transversal diameter; **Fun**, functional.

| First phalanx (Proximal) |                          |                 |                |                 |              |               |              |               |
|--------------------------|--------------------------|-----------------|----------------|-----------------|--------------|---------------|--------------|---------------|
| Locality                 | Specimen<br>n°/Reference | Total<br>Length | Proximal<br>TD | Proximal<br>APD | Distal<br>TD | Distal<br>APD | Diaph.<br>TD | Diaph.<br>APD |
| MR                       | MPUZ-<br>MLR-1           | 95              | 40             | 42.1            | 34.9         | 30.4          | 40           | 31.1          |
| LVF                      | MNCN-<br>54849           |                 | 34.68          |                 |              |               |              |               |
| LVF                      | MNCN-<br>32080           |                 |                |                 |              |               |              |               |
| LVF                      | MNCN-<br>32079           |                 |                |                 |              |               |              |               |
| LVF                      | MNCN-<br>36102           | 91.37           | 37.62          | 43.26           | 29.29        | 26.12         |              |               |
| LVF                      | MNCN-<br>43614           |                 |                |                 |              | 26.24         |              |               |
| LVF                      | MNCN-<br>43615           |                 |                |                 | 24.67        |               |              |               |
| LVF                      | MNCN-<br>42688           |                 | 35.58          | 44.42           | 33.24        | 27.9          |              |               |
| LVF                      | MNCN-<br>42687           |                 |                | 38.84           |              |               |              |               |
| LVF                      | MNCN-<br>42686           |                 |                |                 | 32.65        | 27.74         |              |               |
| LVF                      | MNCN-<br>42685           |                 |                |                 | 34.87        | 26.73         |              |               |
| LVF                      | MNCN-<br>42684           |                 |                |                 | 35.06        | 27.04         | 30.63        |               |
| LVF                      | MNCN-<br>42683           |                 |                |                 | 34.71        | 29.62         | 31.06        |               |
| LVF                      | MNCN-<br>42682           |                 |                |                 | 31.95        | 24.05         | 30.57        | 24.93         |
| LVF                      | MNCN-<br>42681           |                 |                |                 | 33.09        | 26.83         | 28.47        | 28.69         |
| LVF                      | MNCN-<br>42680           | 86.87           | 36.64          | 40.86           | 27.56        | 24.06         | 28.76        | 27.96         |

|     |                 |       |       |       |       |       |       |       |
|-----|-----------------|-------|-------|-------|-------|-------|-------|-------|
| LVF | MNCN-42679      | 83.21 | 33.37 | 40.98 | 29.84 | 23.05 | 26.96 | 28.56 |
| LVF | MNCN-42678      | 91    | 42.39 | 46.51 | 34.68 | 28.89 | 32.95 | 30.85 |
| LVF | MNCN-42677      | 89.28 | 41.54 | 45.9  | 33.86 | 29.3  | 28.44 | 28.91 |
| LVF | MNCN-42676      | 94.06 | 41.25 | 44.37 | 34.96 | 27.29 | 32.63 | 29.51 |
| LVF | MNCN-42675      | 86.4  | 36.49 | 42.18 | 29.64 | 27.24 | 27.5  | 26.4  |
| LVF | MNCN-42674      | 87.71 | 34.75 | 39.69 | 32.08 | 24.64 | 28.87 | 26.62 |
| LVF | MNCN-42673      | 92.1  | 38.7  | 45.52 | 37.3  | 26.33 | 28.79 | 26.66 |
| LVF | MNCN-42672      | 91.45 | 40.06 | 43.11 | 33.15 | 28.29 | 29.91 | 28.34 |
| LVF | MNCN-42671      | 95.49 | 39.56 | 42.92 | 33.15 | 26.83 | 30.03 | 27.9  |
| LVF | MNCN-42670      | 86.52 | 35    | 43.45 | 30.78 | 27.94 | 27.57 | 30.28 |
| LVF | MNCN-42669      | 87.15 | 31.94 | 40.43 | 30.56 | 26.46 | 26.8  | 26.14 |
| LVF | MNCN-42668      | 89.54 | 40.41 | 44.69 | 34.33 | 25.74 | 31.97 | 31.03 |
| LVF | MNCN-42667      | 96.47 | 39.98 | 43.35 | 32.58 | 27.57 | 29.41 | 27.81 |
| LVF | MNCN-42666      | 83.9  | 33.41 | 38.83 | 28.38 | 27.78 | 26.66 | 25.49 |
| LVF | MNCN-42665      | 87.42 | 35.4  | 41.33 | 29.18 | 24.15 | 26.53 | 26.67 |
| LVF | MNCN-42664      | 82.93 | 37.29 | 40.13 | 28.97 | 25.91 | 26.45 | 28.51 |
| LVF | MNCN-42663      | 99.13 | 44.57 | 45.95 | 35.49 | 29.16 | 31.87 | 30.72 |
| NOM | Crusafont, 1952 | 95    | 45    | 39.5  |       |       |       |       |
| LVF | Crusafont,      | 90.5  | 44    | 38.4  | 32.5  |       |       |       |

| 1952                    |                       |              |             |              |           |            |           |
|-------------------------|-----------------------|--------------|-------------|--------------|-----------|------------|-----------|
| LVF                     | Crusafont, 1952       | 80.5         | 35          | 40           | 30        |            |           |
| Second phalanx (Medial) |                       |              |             |              |           |            |           |
| Locality                | Specimen n°/Reference | Total Length | Proximal TD | Proximal APD | Distal TD | Distal APD | Diaph. TD |
| LVF                     | MNCN-54848            | 47.3         | 34.51       | 37.81        | 32.69     | 33.66      | 33.21     |
| LVF                     | MNCN-32718            |              |             | 33.7         | 29.56     |            | 23.79     |
| LVF                     | MNCN-42727            |              | 28.99       | 35.27        |           |            |           |
| LVF                     | MNCN-42726            | 48.83        | 34.24       | 39.6         | 33.61     | 37.37      | 31.64     |
| LVF                     | MNCN-42725            | 50.74        | 29.88       | 37.01        | 26.58     | 33.17      | 26.27     |
| LVF                     | MNCN-42724            | 50.51        | 30.1        | 35.01        | 31.57     | 33.57      | 25.49     |
| LVF                     | MNCN-42723            | 50.13        | 35.01       | 37.72        | 31.3      | 34.77      | 28.46     |
| LVF                     | MNCN-42722            | 49.16        | 32.76       | 36           | 30.39     | 35.15      | 27.16     |
| LVF                     | MNCN-42721            | 46.13        | 29.51       | 34.67        | 24.48     | 30.57      | 24.67     |
| LVF                     | MNCN-42720            | 46.52        | 36.29       | 37.49        | 31.7      | 32.83      | 32.3      |
| LVF                     | MNCN-42719            | 46.08        | 36.78       | 39.48        |           | 37.13      | 33.15     |
| LVF                     | MNCN-42718            | 44.91        | 29.64       | 36.88        | 28.17     | 33.24      | 29.07     |
| LVF                     | MNCN-42717            | 51.73        | 33.34       | 38.52        | 28.33     | 33.22      | 28.15     |
| LVF                     | MNCN-42716            | 43.9         | 30.2        | 35.3         | 26.42     | 29.95      | 27.48     |
| LVF                     | MNCN-42715            | 47.12        | 29.4        | 34.39        | 29.95     | 35.39      | 28.93     |
| LVF                     | MNCN-42714            | 47.89        | 29.19       | 35.19        | 26.32     |            | 25.38     |
| LVF                     | MNCN-42713            | 51.93        | 38.1        | 40.63        | 31.99     | 37.44      | 34.61     |
| LVF                     | MNCN-42712            | 51.94        | 29.83       | 33.79        |           | 30.58      | 24.71     |
| LVF                     | MNCN-42711            | 45.52        | 32.45       | 36.42        | 27.93     | 33.89      | 26.97     |
| LVF                     | MNCN-42710            | 47.99        | 34.68       | 32.7         | 33.46     | 36.13      | 31.4      |
| LVF                     | MNCN-42709            | 48.23        | 36.21       | 39.27        | 31.92     | 36.35      | 35.38     |
| LVF                     | MNCN-42708            | 44.82        | 31.52       | 33.82        | 28.96     | 34.04      | 29.61     |
| LVF                     | MNCN-42707            | 48.97        | 33          | 39.81        | 33.03     | 37.14      | 30.17     |

|                        |                              |                 |                  |                       |         |          |       |
|------------------------|------------------------------|-----------------|------------------|-----------------------|---------|----------|-------|
| LVF                    | MNCN-42706                   | 46.74           | 30.85            | 35.28                 | 27.29   | 32.14    | 25.68 |
| LVF                    | MNCN-42705                   |                 | 33.41            | 37.25                 |         |          | 30.19 |
| LVF                    | MNCN-42704                   | 45.81           | 31.83            | 37.18                 | 30.19   | 36.68    | 27.9  |
| LVF                    | MNCN-42703                   | 46.24           | 34.41            | 36.74                 | 31.98   | 34.37    | 29.65 |
| LVF                    | MNCN-42702                   |                 | 32.06            | 34.97                 |         |          | 26.99 |
| LVF                    | MNCN-42701                   |                 | 33.93            | 37.49                 |         |          | 27.44 |
| LVF                    | MNCN-42700                   |                 |                  |                       |         | 33.13    |       |
| LVF                    | MNCN-42699                   | 48.93           | 30.27            | 31.86                 | 27.75   | 34.45    | 23.74 |
| LVF                    | MNCN-42698                   | 49.93           | 28.4             | 36.26                 | 28.01   | 32.97    | 26.21 |
| LVF                    | MNCN-42697                   | 49.73           | 29.77            | 37.41                 | 26.88   | 31.08    | 25.82 |
| LVF                    | MNCN-42696                   | 48.56           | 29               | 34.21                 | 27.38   | 31.53    | 25.54 |
| LVF                    | MNCN-42695                   | 49.74           | 33.99            | 37.12                 | 31.93   | 36.01    | 28.96 |
| LVF                    | MNCN-42694                   | 44.37           | 28.69            |                       | 27.9    | 32.26    | 26.64 |
| LVF                    | MNCN-42693                   | 47.85           | 30.53            | 38.38                 |         |          | 26.68 |
| LVF                    | MNCN-42692                   | 46.43           | 29.95            | 35.88                 | 25.56   | 30.97    | 25.41 |
| LVF                    | MNCN-42691                   | 46.6            | 30.99            | 35.88                 | 28.66   | 32.63    | 29.32 |
| LVF                    | MNCN-42690                   | 50.68           | 35.74            |                       | 30.59   | 36       | 29.98 |
| LVF                    | MNCN-42689                   | 43.24           | 30.08            | 32.7                  | 29.42   | 36.65    | 27.82 |
| NOM                    | Crusafont, 1952              | 50.5            | 34.5             | 43.7                  | 34      |          |       |
| LVF                    | Crusafont, 1952              | 49              | 32               | 38                    | 30      |          |       |
| Third phalanx (Distal) |                              |                 |                  |                       |         |          |       |
| Locality               | Specimen<br>n°/Reference     | Total<br>Length | Dorsal<br>Length | Proximal<br>total APD | Fun. TD | Fun. APD |       |
| LVF                    | MNCN-54850                   |                 |                  |                       |         | 22.43    |       |
| LVF                    | MNCN-43616                   |                 |                  |                       | 43.07   | 26.1     | 33.99 |
| LVF                    | MNCN-42730                   |                 |                  |                       |         | 28.99    |       |
| LVF                    | MNCN-42729                   |                 |                  |                       | 43.87   | 23.12    | 29.28 |
| LVF                    | MNCN-42728                   | 72.84           | 56.73            |                       | 45.67   | 25.98    | 33.02 |
| LVF                    | Montoya and<br>Morales, 1991 |                 |                  |                       | 48      | 28.2     |       |

TABLE 16S. Dimensions of the sesamoids of *D. pachecoi* in mm. **Abbreviations:** **APD**, anteroposterior diameter; **DT**, transversal diameter.

| SED              |          |                       |                              |             |                              |
|------------------|----------|-----------------------|------------------------------|-------------|------------------------------|
| Specimen nº      | Total TD | Interdigital facet TD | External facet TD            | Maximum APD | Maximum Proximodistal length |
| MNCN-43583       | 32.99    | 20.55                 | 10.66                        | 14.59       | 16.01                        |
| MNCN-43584       | 25.55    | 14.42                 | 8.79                         | 11.33       | 14.21                        |
| MNCN-32350       | 33.22    | 17.58                 | 13.09                        | 18.7        |                              |
| MNCN-43582       | 37.68    | 21.76                 | 14.65                        | 17.86       | 20.06                        |
| SEP external     |          |                       |                              |             |                              |
| Specimen nº      | Total TD | Maximum APD           | Maximum Proximodistal length |             |                              |
| MNCN- 32070      | 14.99    | 22.51                 | 24.97                        |             |                              |
| MNCN- 32071      | 13.39    | 21.06                 | 24.75                        |             |                              |
| MNCN- 32072      | 15.61    | 21.81                 | 25.55                        |             |                              |
| SEP interdigital |          |                       |                              |             |                              |
| Specimen nº      | Total TD | Maximum APD           | Maximum Proximodistal length |             |                              |
| MNCN- 32073      | 14.65    | 15.54                 | 29.58                        |             |                              |
| MNCN- 32074      | 14.04    | 16.47                 | 31.38                        |             |                              |
| MNCN- 32075      | 15.69    | 18.77                 | 38.35                        |             |                              |
| MNCN- 32076      | 17.02    | 20.75                 | 34.74                        |             |                              |
| MNCN-32719       | 15.13    | 18.46                 | 30.14                        |             |                              |

#### LITERATURE CITED

- Alcalá, L. 1994. Macromamíferos neógenos de la fosa de Alfambra-Teruel. PhD. dissertation, Instituto de Estudios Turolenses y Museo Nacional de Ciencias Naturales, CSIC, Teruel, 554 pp.
- Crusafont, M. 1952. Los jiráfidos fósiles de España. Diputación Provincial de Barcelona. Memorias y comunicaciones del Instituto Geológico VIII: Premio extraordinario de Doctorado, CSIC, Barcelona, 239 pp.

- Crusafont, M. 1966. Caracterización del Pontiense en el afloramiento terciario de Campisabablos Guadalajara. Notas y Comunicaciones del Instituto Geológico y Minero de España 85:61–70.
- Montoya, P., and J. Morales. 1991. *Birgerbohlina schaubi* Crusafont, 1952 (Giraffidae, Mammalia) del Turoliense inferior de Crevillente-2 (Alicante, España). Filogenia e historia biogeográfica de la subfamilia Sivatheriinae. Bulletin du Muséum National d'Histoire Naturelle, Paris, 4<sup>e</sup> sér., 13:177–200.
