# Supplementary material
Source: publisher figshare collection journal article supplement (https://tandf.figshare.com/articles/dataset/_/3443402)
Supplement: Supplementary file 3 [file 2]

SUPPLEMENTARY DATA 2

Comparative anatomy, phylogeny and systematics of the Miocene giraffid *Decennatherium pachecoi* Crusafont, 1952 (Mammalia, Ruminantia, Pecora): state of the art

MARIA RIOS,<sup>\*</sup> ISRAEL M. SÁNCHEZ, and JORGE MORALES

Departamento de Paleobiología, Museo Nacional de Ciencias Naturales-CSIC, C/ José

Gutiérrez Abascal, 2, 28006 Madrid, Spain, maria.rios.iba@mncn.csic.es;

micromeryx@gmail.com; mcnm166@mncn.csic.es

<sup>\*</sup>Corresponding author.

SUPPLEMENTARY DATA 2. Statistics of the dimensions (in mm) of the dentition and postcranial skeleton of *Decennatherium pachecoi* from Los Valles de Fuentidueña, Nombrevilla, Relea, Pedrajas de San Esteban (Crusafont, 1952), Masia del Barbo, Masia de La Roma (Alcalá, 1994) and Campisabalos (Crusafont, 1966).

TABLE 1S. Statistics of the dimensions of the decidual dentition of *D. pachecoi* in mm. **Abbreviations:** **max**, maximum value; **min**, minimum value; **N**, number of specimens; **SD**, standard deviation.

|        |   |       |       |         |         |
|--------|---|-------|-------|---------|---------|
| d2     |   |       |       |         |         |
|        | N | min   | max   | Media   | SD      |
| Length | 2 | 20.50 | 24.30 | 22.4000 | 2.68701 |
| Width  | 2 | 12.50 | 13.30 | 12.9000 | 0.56569 |
| d3     |   |       |       |         |         |
|        | N | min   | max   | Media   | SD      |
| Length | 1 | 23.69 | 23.69 | 23.6900 |         |
| Width  | 2 | 11.99 | 12.27 | 12.1300 | 0.19799 |
| d4     |   |       |       |         |         |
|        | N | min   | max   | Media   | SD      |
| Length | 3 | 24.35 | 38.09 | 33.2267 | 7.69916 |
| Width  | 3 | 15.40 | 18.33 | 17.3167 | 1.66079 |

TABLE 2S. Statistics of the dimensions of the lower permanent dentition of *D. pachecoi* in mm. **Abbreviations:** **max**, maximum value; **min**, minimum value; **N**, number of specimens; **SD**, standard deviation.

|        |    |       |       |         |         |
|--------|----|-------|-------|---------|---------|
| p2     |    |       |       |         |         |
|        | N  | min   | max   | Media   | SD      |
| Length | 15 | 22.52 | 27.50 | 25.4040 | 1.63468 |
| Width  | 18 | 12.92 | 16.40 | 14.1211 | 0.86668 |
| p3     |    |       |       |         |         |
|        | N  | min   | max   | Media   | SD      |
| Length | 15 | 28.15 | 31.60 | 29.7613 | 1.08703 |
| Width  | 15 | 16.36 | 21.30 | 17.8707 | 1.30263 |
| p4     |    |       |       |         |         |
|        | N  | min   | max   | Media   | SD      |

|        |    |       |       |         |         |
|--------|----|-------|-------|---------|---------|
| Length | 11 | 27.73 | 35.00 | 32.2209 | 2.29404 |
| Width  | 12 | 17.50 | 25.05 | 21.7383 | 2.18460 |
| m1     |    |       |       |         |         |
|        | N  | min   | max   | Media   | SD      |
| Length | 8  | 34.50 | 38.60 | 37.4000 | 1.33524 |
| Width  | 7  | 24.60 | 28.50 | 26.1714 | 1.41506 |
| m2     |    |       |       |         |         |
|        | N  | min   | max   | Media   | SD      |
| Length | 7  | 38.68 | 42.80 | 40.6243 | 1.65702 |
| Width  | 4  | 27.80 | 29.00 | 28.4250 | 0.61305 |
| m3     |    |       |       |         |         |
|        | N  | min   | max   | Media   | SD      |
| Length | 10 | 47.50 | 56.60 | 53.8140 | 3.02061 |
| Width  | 8  | 24.00 | 28.70 | 25.9250 | 1.55449 |

TABLE 3S. Statistics of the dimensions of the upper permanent dentition of *D. pachecoi* in mm.  
**Abbreviations:** **max**, maximum value; **min**, minimum value; **N**, number of specimens; **SD**, standard deviation.

|        |   |       |       |         |         |
|--------|---|-------|-------|---------|---------|
| P4     |   |       |       |         |         |
|        | N | min   | max   | Media   | SD      |
| Length | 6 | 25.00 | 30.00 | 26.9183 | 1.77088 |
| Width  | 4 | 33.15 | 34.20 | 33.6625 | 0.51539 |
| M1     |   |       |       |         |         |
|        | N | min   | max   | Media   | SD      |
| Length | 5 | 33.45 | 40.00 | 37.6900 | 2.88193 |
| Width  | 3 | 33.71 | 37.00 | 35.9033 | 1.89948 |
| M2     |   |       |       |         |         |
|        | N | min   | max   | Media   | SD      |
| Length | 5 | 36.23 | 45.00 | 40.2460 | 3.77195 |
| Width  | 4 | 33.97 | 41.70 | 38.7425 | 3.58774 |
| M3     |   |       |       |         |         |

|        | N | min   | max   | Media   | SD      |
|--------|---|-------|-------|---------|---------|
| Length | 5 | 37.33 | 43.50 | 40.1660 | 2.30440 |
| Width  | 4 | 35.51 | 39.40 | 37.1525 | 1.65097 |

TABLE 4S. Statistics of the dimensions of the canines of *D. pachecoi* in mm. **Abbreviations:** **max**, maximum value; **min**, minimum value; **N**, number of specimens; **SD**, standard deviation.

| Canine |   |       |       |         |         |
|--------|---|-------|-------|---------|---------|
|        | N | min   | max   | Media   | SD      |
| Length | 7 | 17.00 | 23.00 | 20.1000 | 2.29565 |
| Width  | 7 | 20.00 | 28.00 | 24.2857 | 2.81154 |

TABLE 5S. Statistics of the dimensions of the incisors of *D. pachecoi* in mm. **Abbreviations:** **max**, maximum value; **min**, minimum value; **N**, number of specimens; **SD**, standard deviation.

| Incisor |    |       |       |         |         |
|---------|----|-------|-------|---------|---------|
|         | N  | min   | max   | Media   | SD      |
| Length  | 17 | 14.10 | 20.00 | 16.9471 | 1.52525 |
| Width   | 18 | 20.00 | 30.00 | 26.7167 | 2.53638 |

TABLE 6S. Statistics of the dimensions of the scapula of *D. pachecoi* in mm. **Abbreviations:** **APD**, anteroposterior diameter; **DT**, transversal diameter; **Glen. Cav**, glenoid cavity; **max**, maximum value; **min**, minimum value; **N**, number of specimens; **SD**, standard deviation.

| Scapula        |   |        |        |          |    |
|----------------|---|--------|--------|----------|----|
|                | N | min    | max    | Media    | SD |
| Min neck APD   | 1 | 90.67  | 90.67  | 90.6700  |    |
| Distal TD      | 1 | 57.37  | 57.37  | 57.3700  |    |
| Distal APD     | 1 | 127.21 | 127.21 | 127.2100 |    |
| Glen. cav. APD | 1 | 87     | 87     | 86.54    |    |

TABLE 7S. Statistics of the dimensions of the humerus of *D. pachecoi* in mm. **Abbreviations:** **APD**, anteroposterior diameter; **Diaph**, daphysis; **DT**, transversal diameter; **max**, maximum value; **min**, minimum value; **N**, number of specimens; **SD**, standard deviation.

| Humerus |  |  |  |  |  |
|---------|--|--|--|--|--|
|---------|--|--|--|--|--|

|                   | N | min    | max    | Media    | SD       |
|-------------------|---|--------|--------|----------|----------|
| Total length      | 1 | 405.37 | 405.37 | 405.3700 |          |
| Functional length | 1 | 379.58 | 379.58 | 379.5800 |          |
| Diaph. TD         | 4 | 49.34  | 61.49  | 54.2450  | 5.16538  |
| Diaph. APD        | 4 | 56     | 64     | 60.89    | 4.027    |
| Distal TD         | 5 | 98.05  | 112.49 | 103.9060 | 5.64045  |
| Distal APD        | 5 | 60.16  | 106.79 | 83.5880  | 18.27453 |
| Proximal TD       | 1 | 127.64 | 127.64 | 127.6400 |          |
| Proximal APD      | 1 | 139    | 139    | 139.38   |          |
| Trochlea APD      | 6 | 43     | 55     | 48.62    | 4.470    |

TABLE 8S Statistics of the dimensions of the radius of *D. pachecoi* in mm. **Abbreviations:** **Anc. Proc.**, anconeal process; **APD**, anteroposterior diameter; **Diaph**, daphysis; **DT**, transversal diameter; **max**, maximum value; **min**, minimum value; **N**, number of specimens; **Olec**, olecranon; **SD**, standard deviation.

| Radius-ulna    |   |       |       |         |         |
|----------------|---|-------|-------|---------|---------|
|                | N | min   | max   | Media   | SD      |
| Diaph. TD      | 3 | 51.88 | 55.93 | 54.0133 | 2.03367 |
| Diaph. APD     | 3 | 38.32 | 42.78 | 39.9367 | 2.47011 |
| Distal TD      | 1 | 93.07 | 93.07 | 93.0700 |         |
| Distal APD     | 1 | 57    | 57    | 57.27   |         |
| Proximal TD    | 1 | 93.29 | 93.29 | 93.2900 |         |
| Proximal APD   | 1 | 53.36 | 53.36 | 53.3600 |         |
| Olec. APD      | 1 | 77.60 | 77.60 | 77.6000 |         |
| Olec. Min APD  | 1 | 86    | 86    | 86.18   |         |
| Olec. Length   | 1 | 134   | 134   | 134.00  |         |
| Anc. Proc. APD | 1 | 104   | 104   | 104.26  |         |

TABLE 9S. Statistics of the dimensions of the carpals of *D. pachecoi* in mm. **Abbreviations:** **APD**, anteroposterior diameter; **DT**, transversal diameter; **max**, maximum value; **min**, minimum value; **N**, number of specimens; **SD**, standard deviation.

| Scaphoid        |    |       |       |         |         |
|-----------------|----|-------|-------|---------|---------|
|                 | N  | min   | max   | Media   | SD      |
| Anterior Height | 17 | 34.99 | 41.78 | 37.6800 | 1.66612 |
| Proximal TD     | 16 | 22.33 | 34.48 | 28.4256 | 3.02607 |

|                     |    |       |       |         |         |
|---------------------|----|-------|-------|---------|---------|
| APD                 | 15 | 50.32 | 60.72 | 56.4127 | 2.89647 |
| Semilunate          |    |       |       |         |         |
|                     | N  | min   | max   | Media   | SD      |
| Anterior Height     | 16 | 34.69 | 40.15 | 36.9894 | 1.68074 |
| Proximal TD         | 16 | 28.45 | 37.66 | 33.8306 | 2.48087 |
| Distal TD           | 11 | 23.50 | 31.85 | 28.0855 | 2.57767 |
| APD                 | 13 | 47    | 57    | 53.11   | 3.058   |
| Pyramidal           |    |       |       |         |         |
|                     | N  | min   | max   | Media   | SD      |
| Anterior Height     | 17 | 34.94 | 45.69 | 39.4424 | 2.24055 |
| Maximum Height      | 14 | 46.54 | 55.28 | 51.5136 | 2.81513 |
| TD                  | 16 | 21.12 | 42.80 | 32.4350 | 4.89769 |
| APD                 | 13 | 42    | 51    | 45.10   | 2.345   |
| Pisiform            |    |       |       |         |         |
|                     | N  | min   | max   | Media   | SD      |
| Posterior Height    | 5  | 28.17 | 32.25 | 30.0300 | 1.45576 |
| APD                 | 5  | 35.19 | 40.00 | 37.9400 | 2.14307 |
| Magnotrapezoid      |    |       |       |         |         |
|                     | N  | min   | max   | Media   | SD      |
| Anterior TD         | 13 | 43.24 | 50.75 | 47.7377 | 2.15361 |
| Posterior TD        | 11 | 36.22 | 43.15 | 40.3027 | 2.42293 |
| APD                 | 14 | 45.42 | 56.19 | 50.0979 | 3.01241 |
| Anterior Height     | 16 | 22    | 27    | 24.05   | 1.450   |
| Unciform            |    |       |       |         |         |
|                     | N  | min   | max   | Media   | SD      |
| Anterior Height     | 14 | 26.35 | 29.35 | 27.7879 | 0.87552 |
| Semilunate Facet TD | 14 | 10.89 | 14.21 | 12.5800 | 0.97353 |
| Pyramidal Facet TD  | 14 | 22.18 | 29.22 | 25.1043 | 2.24339 |
| Proximal TD         | 14 | 31    | 39    | 34.72   | 2.656   |
| Distal TD           | 14 | 25.65 | 36.18 | 31.8329 | 3.49472 |
| APD                 | 11 | 41.47 | 50.28 | 46.2391 | 3.16475 |
| Maximum Height      | 14 | 28.48 | 36.39 | 31.7371 | 2.11678 |

TABLE 10S. Statistics of the dimensions of the metacarpal III-IV of *D. pachecoi* in mm. **Abbreviations:** **APD**, anteroposterior diameter; **Diaph**, diaphysis; **DT**, transversal diameter; **max**, maximum value; **min**, minimum value; **N**, number of specimens; **SD**, standard deviation.

| Mc                       |   |        |        |          |          |
|--------------------------|---|--------|--------|----------|----------|
|                          | N | min    | max    | Media    | SD       |
| Total Length             | 1 | 391.00 | 391.00 | 391.0000 |          |
| Proximal TD              | 2 | 73.32  | 90.00  | 81.6600  | 11.79454 |
| Proximal APD             | 2 | 50.23  | 60.00  | 55.1150  | 6.90843  |
| Diaph. TD                | 2 | 36     | 45     | 40.34    | 5.890    |
| Diaph. APD               | 2 | 40.14  | 53.00  | 46.5700  | 9.09339  |
| Distal TD                | 1 | 73.78  | 73.78  | 73.7800  |          |
| Distal APD               | 1 | 45.31  | 45.31  | 45.3100  |          |
| Supraarticular Distal TD | 1 | 73     | 73     | 73.32    |          |
| Uniform facet TD         | 1 | 26     | 26     | 25.72    |          |
| Magnetrapezoid facet TD  | 1 | 45     | 45     | 44.64    |          |

TABLE 11S. Statistics of the dimensions of the femur of *D. pachecoi* in mm. **Abbreviations:** **APD**, anteroposterior diameter; **Diaph**, diaphysis; **DT**, transversal diameter; **max**, maximum value; **min**, minimum value; **N**, number of specimens; **SD**, standard deviation; **Troc**, trochlea.

| Femur      |   |       |       |         |    |
|------------|---|-------|-------|---------|----|
|            | N | min   | max   | Media   | SD |
| Distal TD  | 1 | 82.09 | 82.09 | 82.0900 |    |
| Distal APD | 1 | 81.15 | 81.15 | 81.1500 |    |
| Troc. TD   | 1 | 32.71 | 32.71 | 32.7100 |    |

TABLE 12S. Statistics of the dimensions of the tibia of *D. pachecoi* in mm. **Abbreviations:** **APD**, anteroposterior diameter; **Diaph**, diaphysis; **DT**, transversal diameter; **Fun**, functional; **max**, maximum value; **min**, minimum value; **N**, number of specimens; **SD**, standard deviation.

| Tibia             |   |        |        |          |         |
|-------------------|---|--------|--------|----------|---------|
|                   | N | min    | max    | Media    | SD      |
| Toral length      | 1 | 497.78 | 497.78 | 497.7800 |         |
| Functional length | 1 | 434.39 | 434.39 | 434.3900 |         |
| Diaph. TD         | 4 | 52.07  | 59.03  | 54.4250  | 3.16373 |

|                 |   |        |        |          |         |
|-----------------|---|--------|--------|----------|---------|
| Diaph. APD      | 4 | 37     | 43     | 40.14    | 2.345   |
| Distal TD       | 5 | 72.02  | 82.74  | 79.1520  | 4.23894 |
| Distal APD      | 6 | 58.75  | 65.47  | 62.1167  | 2.33871 |
| Proximal TD     | 1 | 121.68 | 121.68 | 121.6800 |         |
| Proximal APD    | 1 | 127    | 127    | 126.89   |         |
| Fun. Distal TD  | 6 | 54     | 58     | 56.01    | 1.443   |
| Fun. Distal APD | 6 | 46     | 52     | 48.71    | 2.538   |

TABLE 13S. Statistics of the dimensions of the tarsals of *D. pachecoi* in mm. **Abbreviations:** **APD**, anteroposterior diameter; **Diaph**, daphysis; **DT**, transversal diameter; **max**, maximum value; **min**, minimum value; **N**, number of specimens; **s**, sustentaculum; **SD**, standard deviation; **t.c**, tuber calcis.

|                  |    |        |        |          |          |
|------------------|----|--------|--------|----------|----------|
| Maleolar         |    |        |        |          |          |
|                  | N  | min    | max    | Media    | SD       |
| Maximum Height   | 13 | 28.39  | 33.67  | 30.4146  | 1.61896  |
| APD              | 16 | 39.61  | 45.93  | 43.7481  | 1.66615  |
| TD               | 16 | 18.36  | 22.98  | 20.5850  | 1.23374  |
| Posterior Height | 15 | 26     | 31     | 27.60    | 1.482    |
| Calcaneus        |    |        |        |          |          |
|                  | N  | min    | max    | Media    | SD       |
| Total Length     | 6  | 147.76 | 184.41 | 171.5150 | 13.05981 |
| t.c. TD          | 10 | 32.41  | 45.21  | 37.9300  | 4.60758  |
| t.c. APD         | 9  | 35.17  | 53.36  | 44.0322  | 6.34751  |
| Diaph. TD        | 10 | 23     | 30     | 25.41    | 2.186    |
| Diaph. APD       | 10 | 42.45  | 49.35  | 46.0490  | 1.87341  |
| s. Length        | 8  | 87.10  | 124.83 | 110.4475 | 13.45734 |
| s. TD            | 11 | 44.31  | 61.77  | 55.4273  | 4.99228  |
| Astragalus       |    |        |        |          |          |
|                  | N  | min    | max    | Media    | SD       |
| Medial Length    | 20 | 71.95  | 83.37  | 76.9455  | 2.95666  |
| Lateral Length   | 26 | 79.39  | 92.00  | 85.7446  | 3.84449  |
| Medial APD       | 19 | 40.42  | 52.94  | 46.6547  | 3.58638  |
| Lateral APD      | 18 | 36     | 54     | 46.57    | 3.782    |
| Distal DT        | 26 | 46.29  | 66.00  | 54.2054  | 4.31082  |
| Navicular-cuboid |    |        |        |          |          |
|                  | N  | min    | max    | Media    | SD       |



|                               |    |       |       |         |         |
|-------------------------------|----|-------|-------|---------|---------|
| TD                            | 10 | 63.89 | 74.05 | 68.3830 | 3.58083 |
| APD                           | 7  | 62.81 | 79.88 | 71.0657 | 5.94279 |
| Cuboid Anterior Height        | 11 | 29.13 | 35.73 | 32.2036 | 2.52043 |
| Navicular Anterior Height     | 11 | 20    | 24    | 21.80   | 1.360   |
| Total Anterior Height         | 10 | 34.51 | 44.08 | 39.5130 | 3.11699 |
| Posterior Height              | 7  | 42.70 | 56.29 | 51.8371 | 4.88306 |
| Astragalus Articular Facet TD | 9  | 51.19 | 57.31 | 54.1200 | 1.87981 |
| Ectomesocuneiform             |    |       |       |         |         |
|                               | N  | min   | max   | Media   | SD      |
| Anterior Height               | 14 | 13.90 | 18.30 | 16.4164 | 1.32187 |
| TD                            | 14 | 24.91 | 49.30 | 30.1229 | 5.72442 |
| APD                           | 13 | 30.00 | 50.42 | 45.3085 | 5.25498 |

TABLE 14S. Statistics of the dimensions of the Metatarsal III-IV of *D. pachecoi* in mm. **Abbreviations:** **APD**, anteroposterior diameter; **Diaph**, daphysis; **DT**, transversal diameter; **Fun**, functional; **max**, maximum value; **min**, minimum value; **N**, number of specimens; **SD**, standard deviation.

|                   |   |        |        |          |          |
|-------------------|---|--------|--------|----------|----------|
| Mt                |   |        |        |          |          |
|                   | N | min    | max    | Media    | SD       |
| Total Length      | 2 | 406.14 | 427.50 | 416.8200 | 15.10380 |
| Diaph. TD         | 9 | 33.38  | 42.46  | 37.0189  | 2.80514  |
| Diaph. APD        | 9 | 36.22  | 47.00  | 40.8844  | 3.77036  |
| Distal TD         | 2 | 66     | 77     | 71.66    | 7.446    |
| Distal APD        | 3 | 42.29  | 47.54  | 44.5400  | 2.70416  |
| Proximal TD       | 7 | 57.42  | 74.12  | 62.3457  | 5.85565  |
| Proximal APD      | 9 | 54.73  | 67.00  | 61.0556  | 4.27013  |
| Suprarticular TD  | 3 | 61     | 78     | 68.17    | 9.121    |
| Functional Length | 2 | 397    | 423    | 410.08   | 18.420   |

TABLE 15S. Statistics of the dimensions of the phalanges of *D. pachecoi* in mm. **Abbreviations:** **APD**, anteroposterior diameter; **Diaph**, daphysis; **DT**, transversal diameter; **Fun**, functional; **N**, number of specimens; **max**, maximum value; **min**, minimum value; **SD**, standard deviation.

|             |  |  |  |  |  |
|-------------|--|--|--|--|--|
| 1st phalanx |  |  |  |  |  |
|-------------|--|--|--|--|--|

|                    | N  | min   | max   | Media   | SD      |
|--------------------|----|-------|-------|---------|---------|
| Total Length       | 23 | 80.50 | 99.13 | 89.6957 | 4.80776 |
| Proximal TD        | 25 | 31.94 | 45.00 | 38.1852 | 3.68995 |
| Proximal APD       | 25 | 38.40 | 46.51 | 42.2688 | 2.46146 |
| Distal TD          | 30 | 25    | 37    | 32.11   | 2.836   |
| Distal APD         | 28 | 23.05 | 30.40 | 26.9036 | 1.80855 |
| Diaph. TD          | 23 | 26.45 | 40.00 | 29.6883 | 3.01099 |
| Diaph. APD         | 21 | 24.93 | 31.10 | 28.2419 | 1.86837 |
| 2nd phalanx        |    |       |       |         |         |
|                    | N  | min   | max   | Media   | SD      |
| Total Length       | 35 | 43.24 | 51.94 | 47.8629 | 2.34356 |
| Proximal TD        | 39 | 28.40 | 38.10 | 32.0392 | 2.62482 |
| Proximal APD       | 38 | 31.86 | 40.63 | 36.2918 | 2.11578 |
| Distal TD          | 33 | 24    | 34    | 29.45   | 2.461   |
| Distal APD         | 34 | 29.95 | 37.44 | 34.0135 | 2.17941 |
| Diaph. TD          | 39 | 23.74 | 35.38 | 28.2556 | 2.91668 |
| 3rd phalanx        |    |       |       |         |         |
|                    | N  | min   | max   | Media   | SD      |
| Total Length       | 1  | 72.84 | 72.84 | 72.8400 |         |
| Dorsal Length      | 1  | 56.73 | 56.73 | 56.7300 |         |
| Proximal total APD | 4  | 43.07 | 48.00 | 45.1525 | 2.18767 |
| Fun. TD            | 6  | 22    | 29    | 25.80   | 2.631   |
| Fun. APD           | 3  | 29.28 | 33.99 | 32.0967 | 2.48705 |

TABLE 16S. Statistics of the dimensions of the sesamoids of *D. pachecoi* in mm. **Abbreviations:** **APD**, anteroposterior diameter; **DT**, transversal diameter; **max**, maximum value; **min**, minimum value; **N**, number of specimens; **SD**, standard deviation.

| SED                          |   |       |       |         |         |
|------------------------------|---|-------|-------|---------|---------|
|                              | N | min   | max   | Media   | SD      |
| Total TD                     | 4 | 25.55 | 37.68 | 32.3600 | 5.02709 |
| Interdigital facet TD        | 4 | 14.42 | 21.76 | 18.5775 | 3.28120 |
| External facet TD            | 4 | 8.79  | 14.65 | 11.7975 | 2.59141 |
| Maximum APD                  | 4 | 11    | 19    | 15.62   | 3.365   |
| Maximum Proximodistal length | 3 | 14.21 | 20.06 | 16.7600 | 2.99625 |

| SEP external                 |   |       |       |         |         |
|------------------------------|---|-------|-------|---------|---------|
|                              | N | min   | max   | Media   | SD      |
| Total TD                     | 3 | 13.39 | 15.61 | 14.6633 | 1.14548 |
| Maximum APD                  | 3 | 21.06 | 22.51 | 21.7933 | 0.72514 |
| SEP interdigital             |   |       |       |         |         |
|                              | N | min   | max   | Media   | SD      |
| Total TD                     | 5 | 14.04 | 17.02 | 15.3060 | 1.13461 |
| Maximum APD                  | 5 | 15.54 | 20.75 | 17.9980 | 2.04692 |
| Maximum Proximodistal length | 5 | 29.58 | 38.35 | 32.8380 | 3.67489 |

#### LITERATURE CITED

- Alcalá, L. 1994. Macromamíferos neógenos de la fosa de Alfambra-Teruel. PhD. dissertation, Instituto de Estudios Turolenses y Museo Nacional de Ciencias Naturales, CSIC, Teruel, 554 pp.
- Crusafont, M. 1952. Los jiráfidos fósiles de España. Diputación Provincial de Barcelona. Memorias y comunicaciones del Instituto Geológico VIII: Premio extraordinario de Doctorado, CSIC, Barcelona, 239 pp.
- Crusafont, M. 1966. Caracterización del Pontense en el afloramiento terciario de Campisabablos Guadalajara. Notas y Comunicaciones del Instituto Geológico y Minero de España 85:61–70.
- Montoya, P., and J. Morales. 1991. *Birgerbohlina schaubi* Crusafont, 1952 (Giraffidae, Mammalia) del Turolense inferior de Crevillente-2 (Alicante, España). Filogenia e historia biogeográfica de la subfamilia Sivatheriinae. Bulletin du Muséum National d'Histoire Naturelle, Paris, 4° sér., 13:177–200.
