# Supplementary material
Source: publisher figshare collection journal article supplement (https://tandf.figshare.com/articles/dataset/_/3443402)
Supplement: Supplementary file 4 [file 2]

Journal of Vertebrate Paleontology

SUPPLEMENTARY DATA 4

Comparative anatomy, phylogeny and systematics of the Miocene giraffid *Decennatherium pachecoi* Crusafont, 1952 (Mammalia, Ruminantia, Pecora): state of the art

MARIA RIOS,<sup>\*</sup> ISRAEL M. SÁNCHEZ, and JORGE MORALES

Departamento de Paleobiología, Museo Nacional de Ciencias Naturales-CSIC, C/ José Gutiérrez Abascal, 2, 28006 Madrid, Spain,  
maria.rios.iba@mncn.csic.es; micromeryx@gmail.com; mcnm166@mncn.csic.es

<sup>\*</sup>Corresponding author.

SUPPLEMENTARY DATA 4. Distribution of the main characters used in the phylogenetic analysis.

TABLE 1S. Distribution of the main characters of the Giraffidae used in the phylogenetic analysis at genus level.

|                        | Number of<br>ossicones (1) | Ossicone<br>position<br>(7, 8, 9)                                        | Ossicone<br>orientation<br>(10, 11, 12) | Ossicone<br>surface and<br>ornamentati<br>on<br>(5, 6) | Ossicone tip<br>(4, 14)                     | Lower teeth<br>length<br>(18, 19) | Metapodial<br>length<br>(30, 34) | Metacarpal<br>robustness<br>(30) | Metapodial<br>palmar<br>trough depth<br>(32, 36)                                                  |
|------------------------|----------------------------|--------------------------------------------------------------------------|-----------------------------------------|--------------------------------------------------------|---------------------------------------------|-----------------------------------|----------------------------------|----------------------------------|---------------------------------------------------------------------------------------------------|
| <b>Basal giraffids</b> |                            |                                                                          |                                         |                                                        |                                             |                                   |                                  |                                  |                                                                                                   |
| <i>Canthumeryx</i>     | 2                          | Above the<br>orbit                                                       | ?                                       | ?                                                      | ?                                           | Small                             | Short                            | Very slender                     | ?                                                                                                 |
| <i>Giraffokeryx</i>    | 4                          | Anterior pair<br>anterior to the<br>orbit,<br>separated at<br>their base | Both pairs<br>posteriorly,<br>curved    | With ridges                                            | No bare<br>ossicone<br>apices, blunt<br>tip | Small                             | Short                            | Very slender                     | ?                                                                                                 |
| <i>Injanatherium</i>   | 4                          | ?                                                                        | ?                                       | With ridges                                            | No bare<br>ossicone<br>apices, blunt<br>tip | Small                             | Short                            | Very slender                     | Very deep<br> |
| <b>Okapinae</b>        |                            |                                                                          |                                         |                                                        |                                             |                                   |                                  |                                  |                                                                                                   |
| <i>Okapia</i>          | 2                          | Above the<br>orbit                                                       | Posteriorly,<br>curved                  | With ridges                                            | Presence of<br>bare ossicone<br>apices      | Small                             | Short                            | Slender                          | Medium<br>   |

|                       |                         |                                                                                          |                                            |                                                                             |                                              |        |           |                        |                                                                                                       |
|-----------------------|-------------------------|------------------------------------------------------------------------------------------|--------------------------------------------|-----------------------------------------------------------------------------|----------------------------------------------|--------|-----------|------------------------|-------------------------------------------------------------------------------------------------------|
| <b>Palaeotraginae</b> |                         |                                                                                          |                                            |                                                                             |                                              |        |           |                        |                                                                                                       |
| <i>Palaeotragus</i>   | 2                       | Above the orbit in <i>P. rouenii</i> , more posterior to the orbit in <i>P. microdon</i> | Only slightly posteriorly, almost straight | Soft                                                                        | Presence of bare ossicone apices, pointy tip | Small  | Short     | Very slender           | Medium-shallow<br> |
| <b>Giraffinae</b>     |                         |                                                                                          |                                            |                                                                             |                                              |        |           |                        |                                                                                                       |
| <i>Giraffa</i>        | 2 + median (if present) |                                                                                          | Posteriorly, curved                        | With ridges, with bumps in some older specimens of <i>G. camelopardalis</i> | No bare ossicone apices, very wide tip       | Medium | Very long | Slender / very slender | Very-shallow<br>   |
| <b>Bohlininae</b>     |                         |                                                                                          |                                            |                                                                             |                                              |        |           |                        |                                                                                                       |
| <i>Bohlinia</i>       | 2                       | More posterior to the orbit                                                              | Posteriorly, curved                        | With ridges                                                                 | No bare ossicone apices, blunt tip           | ?      | Very long | Very slender           | Very deep<br>     |
| <i>Honanotherium</i>  | 2                       | Above the orbit                                                                          | Posteriorly, curved                        | With ridges                                                                 | No bare ossicone apices, blunt tip           | Medium | Long      | Medium robustness      | Very deep<br>    |
| <b>Sivatheriinae</b>  |                         |                                                                                          |                                            |                                                                             |                                              |        |           |                        |                                                                                                       |
| <i>Birgerbohlinia</i> | 4                       | ?                                                                                        | ?, curved                                  | With ridges                                                                 | No bare ossicone apices, blunt               | Large  | Medium    | Very robust            | Very deep                                                                                             |

|                       |   |                                                                                                                 |                                                                                                            |                                                                            |                                                                  |                |                                                         |                      |                                                                                                                                                                                                  |
|-----------------------|---|-----------------------------------------------------------------------------------------------------------------|------------------------------------------------------------------------------------------------------------|----------------------------------------------------------------------------|------------------------------------------------------------------|----------------|---------------------------------------------------------|----------------------|--------------------------------------------------------------------------------------------------------------------------------------------------------------------------------------------------|
|                       |   |                                                                                                                 |                                                                                                            |                                                                            | tip                                                              |                |                                                         |                      |                                                                                                               |
| <i>Sivatherium</i>    | 4 | Anterior pair above or posterior to the orbit, separated at their base                                          | Anterior pair anteriorly, posterior pair posteriorly; curved                                               | With ridges, with bumps in <i>S. maurusium</i> and <i>S. olduvaiense</i> , | No bare ossicone apices, blunt tip                               | Large          | Short / medium in <i>S. hendeyi</i> , short in the rest | Very robust          | <div>Medium / deep</div>   |
| <i>Bramatherium</i>   | 4 | Anterior pair above or posterior to the orbit, anterior and posterior pair united at their base                 | Both pairs posterior / straight, curved                                                                    | With ridges                                                                | No bare ossicone apices, blunt tip                               | Large          | Medium                                                  | Very robust          | <div>Medium</div>                                                                                             |
| <b>Samotheriinae</b>  |   |                                                                                                                 |                                                                                                            |                                                                            |                                                                  |                |                                                         |                      |                                                                                                                                                                                                  |
| <i>Samotherium</i>    | 2 | Above the orbit /in <i>S. boissieri</i> , more posterior to the orbit in <i>S. major</i> and <i>S. neumayri</i> | Posteriorly in <i>S. major</i> , almost straight in <i>S. boissieri</i> and laterally in <i>S. sinense</i> | With ridges                                                                | Presence of bare ossicone apices in <i>S. major</i> , pointy tip | Medium / large | Medium / long                                           | Medium / very robust | <div>Medium-shallow</div>                                                                                   |
| <i>Schansitherium</i> | 1 | More posterior to                                                                                               | Anterior pair anteriorly,                                                                                  | With ridges,                                                               | No bare ossicone                                                 | Small          | Medium                                                  | Medium               | Medium-shallow                                                                                                                                                                                   |

|                       |   |                                                                                                                             |                                               |            |                   |        |        |                   |                                                                                                       |
|-----------------------|---|-----------------------------------------------------------------------------------------------------------------------------|-----------------------------------------------|------------|-------------------|--------|--------|-------------------|-------------------------------------------------------------------------------------------------------|
|                       |   | the orbit in <i>S. quadricornis</i> / Anterior pair anterior to the orbit, anterior and posterior pair united at their base | posterior pair posteriorly; straight / curved | with bumps | apices, blunt tip |        |        | robustness        |                    |
| <i>Decennatherium</i> | ? | ?                                                                                                                           | ?                                             | ?          | ?                 | Medium | Medium | Medium robustness | Medium-shallow<br> |
